# 1 Central vestibular tuning arises from patterned convergence of otolith afferents

2

3 Zhikai Liu<sup>1</sup>, Yukiko Kimura<sup>3</sup>, Shin-ichi Higashijima<sup>3</sup>, David G. Hildebrand<sup>4</sup>, Joshua L.  
4 Morgan<sup>2</sup>, Timothy E. Holy<sup>1</sup>, Martha W. Bagnall<sup>1</sup>

5

6 <sup>1</sup>Washington University in St. Louis, Neuroscience, St. Louis, MO,

7 <sup>2</sup>Washington University in St. Louis, Ophthalmology, St. Louis, MO,

8 <sup>3</sup>National Institute for Basic Biology, Neurobiology, Okazaki, Japan,

9 <sup>4</sup>Rockefeller University, New York, NY

10 \* Corresponding author: [bagnall@wustl.edu](mailto:bagnall@wustl.edu)

11

## 12 **Abstract:**

13 As sensory information moves through the brain, higher-order areas exhibit more  
14 complex tuning than lower areas. Though models predict this complexity is due to  
15 convergent inputs from neurons with diverse response properties, in most vertebrate  
16 systems convergence has only been inferred rather than tested directly. Here we  
17 measure sensory computations in zebrafish vestibular neurons across multiple axes *in*  
18 *vivo*. We establish that whole-cell physiological recordings reveal tuning of individual  
19 vestibular afferent inputs and their postsynaptic targets. An independent approach,  
20 serial section electron microscopy, supports the inferred connectivity. We find that  
21 afferents with similar or differing preferred directions converge on central vestibular  
22 neurons, conferring more simple or complex tuning, respectively. Our data also resolve  
23 a long-standing contradiction between anatomical and physiological analyses by  
24 revealing that sensory responses are produced by sparse but powerful inputs from  
25 vestibular afferents. Together these results provide a direct, quantifiable demonstration  
26 of feedforward input convergence *in vivo*.

27 **Key words:** neural computation; sensory encoding; feedforward excitation;  
28 vestibulospinal neuron; electrical synapse; high-pass tuning; sensorimotor  
29 transformation; body balance

## 30 Introduction

31 Neurons compute information from many different synaptic inputs. A central  
32 challenge in understanding neuronal circuits is determining how the tuning and  
33 connectivity of these inputs affect the resulting computations. For example, neurons in  
34 visual cortex exhibit simple or complex orientation tuning, which is thought to derive  
35 from the convergence of presynaptic inputs with distinct tuning properties (Hubel and  
36 Wiesel, 1962, Alonso and Martinez, 1998). Computational models of such input-output  
37 relationships have fundamentally shaped the way we think of information processing in  
38 the brain (Felleman and Van Essen, 1991, LeCun et al., 2015). However, these models  
39 generally require assumptions about many parameters that can only be measured with  
40 incompatible approaches: the tuning of the presynaptic population, input connectivity,  
41 and synaptic strengths, as well as the activity of the postsynaptic neuron itself. Direct  
42 measurements of these parameters simultaneously are prohibitively difficult in most  
43 systems, making it hard to define neuronal computations *in vivo*.

44 Vestibulospinal (VS) brainstem neurons receive direct vestibular sensory inputs  
45 from peripheral vestibular afferents (Boyle et al., 1992) and project to the spinal cord  
46 (Boyle and Johanson, 2003). Understanding the neuronal computations of VS neurons  
47 would not only inform how vestibular sensory signals are processed in the brain, but  
48 also provide a mechanistic view of sensorimotor transformation. VS neurons, like other  
49 central vestibular neurons, produce diverse responses to head movement. During head  
50 tilt or acceleration, some central vestibular neurons exhibit simple cosine-tuned  
51 responses, similar to those of the afferents: the strongest activity is evoked by  
52 movements in a preferred direction, with little or no response in the orthogonal direction.  
53 In contrast, other central vestibular neurons exhibit more complex responses, including  
54 bidirectional responses (Peterson, 1970) and spatiotemporally complex tuning (Angelaki  
55 et al., 1993). A vectorial model predicts that convergence of several simple cosine-  
56 tuned afferents can fully account for the response of either a simple or a complex  
57 central vestibular neuron, depending on whether those afferents are similarly tuned or  
58 differently tuned (Angelaki, 1992). However, as in other systems, this model has been  
59 technically challenging to test experimentally.

60 We chose to address this question in the small brain of the larval zebrafish. The  
61 VS circuit was previously identified in the larval zebrafish as the homolog of mammals  
62 (Kimmel et al., 1982), which becomes functional as early as 3 days post fertilization  
63 (dpf) (Mo et al., 2010). The accessibility of the larval zebrafish brain for intracellular  
64 recording from identified VS neurons allows us to investigate how central vestibular  
65 neurons compute sensory signals in vertebrates.

66 Here we establish a novel approach to record sensory evoked responses *in vivo*  
67 from VS neurons in the larval zebrafish. We find that individual afferents evoke large  
68 amplitude-invariant excitatory postsynaptic currents (EPSCs), allowing us to separate  
69 distinct afferent inputs that converge onto a given VS neuron. This provides a  
70 mechanism to simultaneously measure the sensory tuning and synaptic strength of  
71 each converging afferent, as well as the response of the postsynaptic neuron. We show

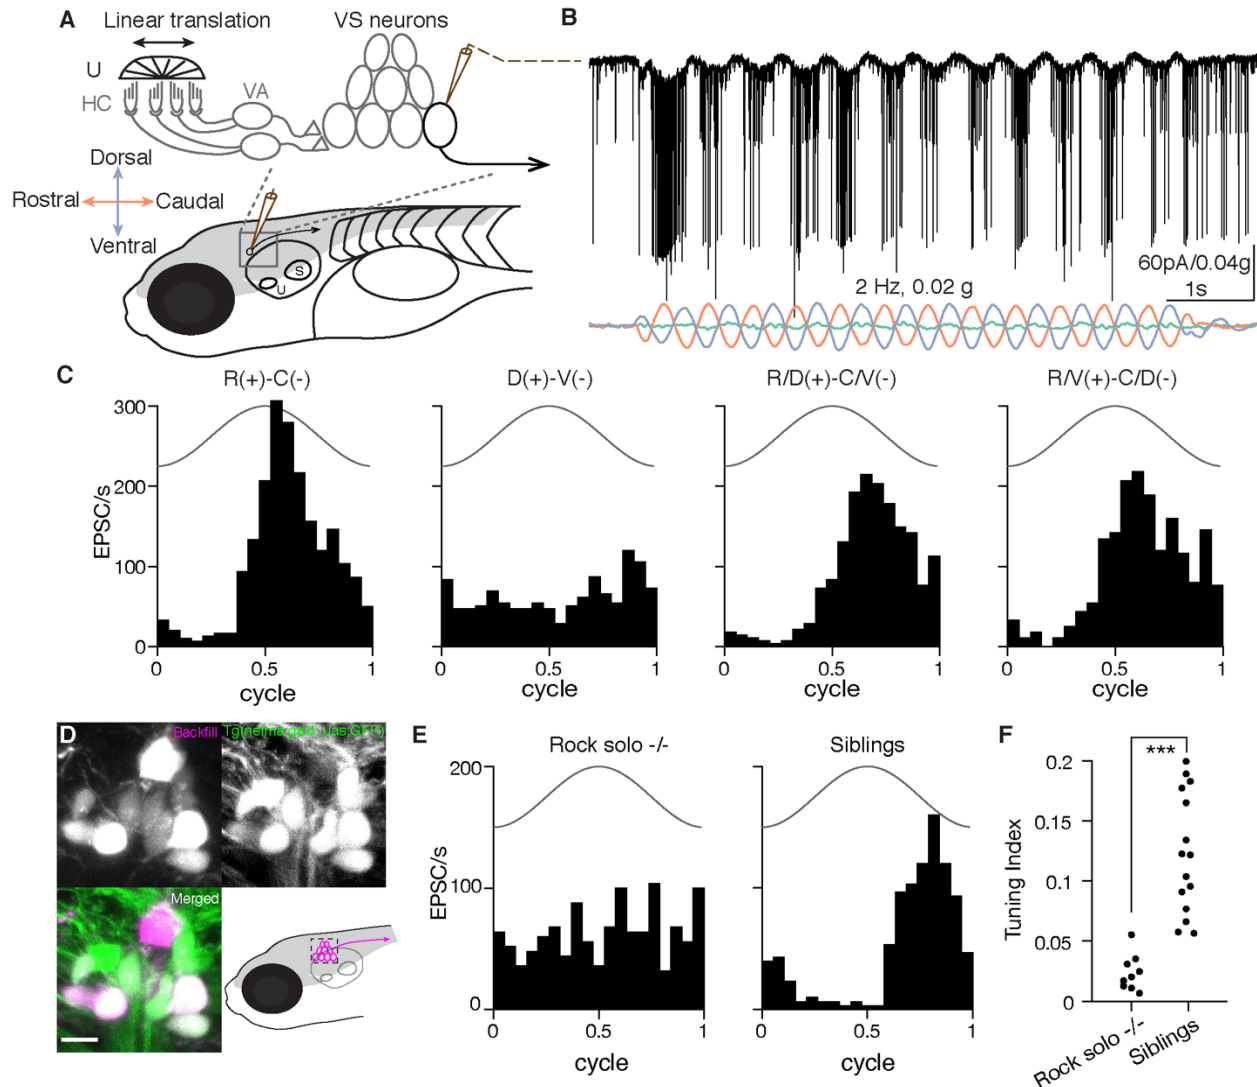

Figure 1: Sensory-evoked responses *in vivo* in vestibulospinal (VS) neurons

A. Schematic representing *in vivo* patch clamp recording configuration and vestibular afferent circuit in larval zebrafish, U: utricle, HC: hair cells, VA: vestibular afferents, S: saccule.

B. Example recording trace from a VS neuron in voltage clamp mode during 2 Hz, 0.02 g translational movement on the R/V(+)-C/D(-) axis. EPSCs, black; acceleration in three body axes, colored (orange, rostral[+]-caudal[-]; green, dorsal[+]-ventral[-]; blue, ipsilateral[+]-contralateral[-]).

C. Sensory-evoked EPSC responses to translation in four different axes for the same VS neuron as in B, across 12 cycles. Solid line, acceleration (2 Hz, 0.02 g).

D. Tg(nefma:gal4; UAS:GFP) (green) colabels VS neurons identified by dye backfilling (magenta) from spinal cord. Scale bar: 5  $\mu$ m

E. Sensory responses of a VS neuron in the best direction in a rock solo -/- (left) and in a het/WT sibling (right).

F. Summary of tuning index in the best direction for all VS neurons recorded in rock solo -/- (9 neurons, 5 fish) and siblings (15 neurons, 10 fish). Mann-Whitney U test,  $p=6.5e-5$

72 that afferents with similar tuning direction preferentially converge, producing simple  
73 tuning in the VS neuron. Furthermore, the smaller number of cells with complex  
74 bidirectional responses receive input from differently tuned afferents, with consequent  
75 simple or complex spiking. We also show that these afferent inputs are sufficient to  
76 predict the tuning of the VS neuron. Together, this work reveals how central neurons in  
77 the brain compute sensory information from their presynaptic inputs.

## 78 **Results:**

### 79 **Sensory evoked responses of vestibulospinal neurons *in vivo***

80 Traditionally, measurements of neuronal responses to vestibular stimuli have been  
81 accomplished by unit recordings (Angelaki and Dickman, 2000, Schor et al., 1984,  
82 Fernandez and Goldberg, 1976a). Directly measuring vestibular-evoked synaptic  
83 currents in central neurons *in vivo* has been technically challenging (Arenz et al., 2008,  
84 Chabrol et al., 2015). We designed a custom whole-cell electrophysiology rig to deliver  
85 translational motion stimuli to 4-7 dpf larval zebrafish via an air-bearing motorized sled  
86 (Fig. 1A). This setup allows intracellular measurement of sensory-evoked responses  
87 from vestibulospinal (VS) neurons on multiple axes *in vivo* for the first time, to the best  
88 of our knowledge. To target identified VS neurons, we generated a Tg(*nefma:gal4*;  
89 UAS:GFP) line, whose labelling overlaps dye backfilling (Figs. 1D, S1) from the spinal  
90 cord, consistent with evidence of *Nefm* expression in mammalian vestibular neurons  
91 (Kodama et al., 2020). We recorded spontaneous EPSCs in voltage clamp, at overall  
92 rates varying from 1 to 365 EPSC/s. Delivery of translational movement evoked  
93 corresponding modulations in EPSC frequency (Fig. 1B). The extent of modulation  
94 varied depending on the direction of the stimulus delivered across four different axes  
95 (Fig. 1C). In this example neuron, EPSC rate was modulated most strongly in the  
96 rostral-caudal (R-C) axis and weakly in the dorsal-ventral (D-V) axis, with intermediate  
97 strength responses for the diagonal directions (R/D-C/V and R/V-C/D).

98 Response to translational movement could derive from the vestibular or other sensory  
99 inputs. In larval zebrafish, the anterior otolith (utricle) is the sole functional vestibular  
100 sensor (Riley and Moorman, 2000). To examine whether utricular signaling is necessary  
101 for the observed tuning, we measured the sensory response of VS neurons in the  
102 *otog<sup>c.1522+2T>A</sup> -/-* (rock solo) animals, which lack the utricle (Mo et al., 2010, Roberts et  
103 al., 2017). Translational stimuli were ineffective at modulating EPSC rate in VS neurons  
104 of rock solo homozygotes in contrast to wild-type/heterozygous siblings (representative  
105 examples, Fig. 1E). Across all recordings, VS neurons of rock solo *-/-* animals exhibit  
106 largely untuned EPSCs compared to siblings, as quantified by a tuning index (Fig. 1F).  
107 Thus, this approach reveals sensory-evoked synaptic responses encoding directional  
108 vestibular stimuli in identified VS neurons *in vivo*.

### 109 **Mixed electrical and chemical synapses mediate the transmission from otolith 110 afferents to VS neurons**

111 What properties define the vestibular afferent synapse onto VS neurons? In  
112 rodents, vestibular afferent synapses onto vestibulo-ocular reflex neurons exhibit

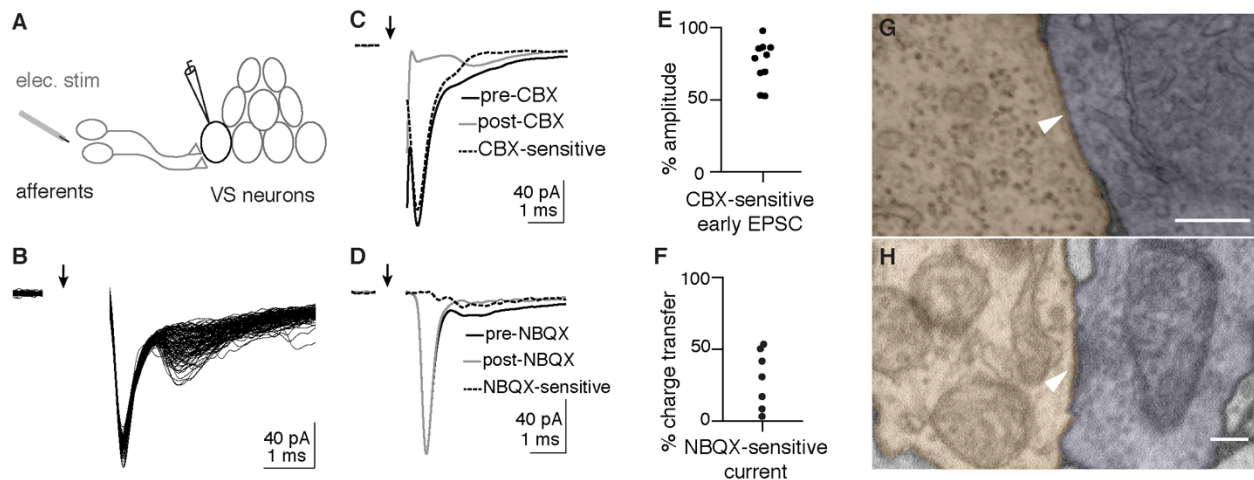

Figure 2: Otolith afferent to VS neuron transmission is mediated by mixed electrical and chemical synapses

A. Schematic of whole-cell recording configuration from VS neuron while electrically stimulating otolith afferents.

B. Example EPSCs evoked by electrical stimulation of the otolith afferents; 105 EPSCs overlaid. Arrow indicates onset of stimulation. Stimulus artifact is blanked.

C. Carbenoxolone (CBX) diminishes the fast component of evoked EPSCs

D. NBQX abolishes the second, slower component of evoked EPSCs

E. Group data quantifying the reduction of early EPSC amplitude by CBX

F. Group data quantifying the total charge transfer that is abolished by NBQX application

G. Example EM image of gap junction between identified otolith afferent (pseudocolored purple) and VS neuron (orange). Scale bar: 200 nm.

H. Example EM image of chemical synapse between otolith afferent (purple) and VS neuron (orange). Scale bar: 200 nm.

113 amplitude-invariant synaptic transmission, mediated by specialized vesicular release  
114 machinery (Bagnall et al., 2008, McElvain et al., 2015, Turecek et al., 2017). To  
115 characterize afferent synaptic input to VS neurons, we electrically stimulated the  
116 vestibular (anterior statoacoustic) ganglion while recording from VS neurons in voltage  
117 clamp (Fig. 2A). Stimulation evoked a synaptic current with two components. The first  
118 component had fast kinetics with short latency ( $0.56 \pm 0.28$  ms,  $n=8$ ), low jitter ( $0.05$   
119  $\pm 0.04$  ms,  $n=8$ ), and invariant EPSC amplitude (SD:  $6.7 \pm 3.9\%$ , normalized to peak)  
120 across trials. In contrast, the second component had slower kinetics and variable  
121 amplitudes (Fig. 2B). We dissected the two components of evoked EPSCs  
122 pharmacologically. Bath application of the gap junction blocker carbenoxolone (CBX,  
123  $500 \mu\text{M}$ ) during afferent stimulation substantially reduced the first component of the  
124 EPSC (Figs. 2C, E). In contrast, bath application of the AMPA receptor antagonist  
125 NBQX ( $10 \mu\text{M}$ ) abolished the second component of synaptic current (Fig. 2D).  
126 Furthermore, the fast EPSCs were not reversed by changing the holding potential (Fig.  
127 S2), a signature behavior of electrical synaptic transmission (Akrouh and  
128 Kerschensteiner, 2013). Thus, the early and late components of afferent-evoked  
129 synaptic currents are mediated by gap junctions and AMPA receptors, respectively.  
130 Across VS neurons, the NBQX-sensitive currents accounted for  $27.1 \pm 20.2\%$  of total  
131 charge transfer ( $n=7$ , Fig. 2F), demonstrating that gap junctional current is the major  
132 component mediating synaptic transmission.

133 To evaluate ultrastructural evidence for mixed synaptic transmission, we re-  
134 imaged existing serial ultrathin sections of a 5.5 dpf larval zebrafish (Hildebrand et al.,  
135 2017) at sufficiently high resolution (1-4 nm/px) to identify synaptic contacts between  
136 myelinated utricular afferents and VS neurons, identified anatomically. We found both  
137 tight junction structures (Fig. 2G), and vesicles apposed to a postsynaptic density (Fig.  
138 2H) at appositions between utricular afferent and VS neurons, consistent with  
139 anatomical evidence for mixed electrical / chemical transmission at this synapse in adult  
140 fish (Korn et al., 1977) and rat (Nagy et al., 2013). Together, these results demonstrate  
141 that VS neurons receive vestibular afferent inputs mediated by amplitude-invariant gap  
142 junctional (electrical) and variable amplitude glutamatergic (chemical) synapses.

### 143 **Inferring afferent tuning from distinct EPSCs**

144 Because electrically mediated EPSCs from afferents to VS neurons exhibited a  
145 fixed amplitude, we hypothesized that we could distinguish the activity of individual  
146 otolith afferents converging onto a given VS neuron by their characteristic EPSC  
147 amplitudes. Indeed, spontaneous and sensory-evoked EPSCs recorded in VS neurons  
148 often fell into distinctive size bins, as visualized in a histogram of EPSC amplitudes  
149 (Figs. 3A, B). EPSCs were sorted into three clusters with unsupervised learning (see  
150 Methods), primarily leveraging their amplitudes. Each of these EPSC clusters showed a  
151 stereotypical amplitude and waveform in this example neuron (Fig. 3A, inset). To test  
152 whether each cluster of EPSCs amplitudes corresponds to an individual afferent, we  
153 used an approach derived from spike sorting: temporal autocorrelation to test for  
154 refractory periods within EPSC event times. Physiologically, one afferent cannot  
155 generate two action potentials within its refractory period (Fernandez et al., 1972); thus

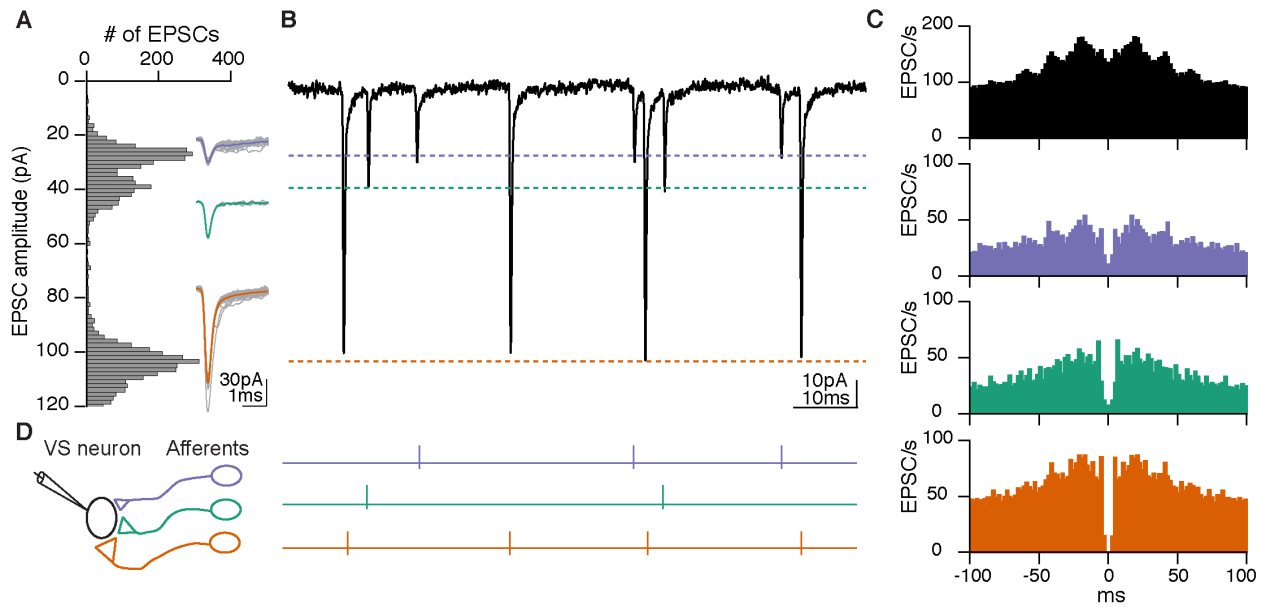

Figure 3: Distinct EPSC amplitudes reflect individual afferent inputs

A. Histogram of spontaneous and sensory-evoked EPSC amplitude distribution of the same VS neuron as Fig. 1B. Inset, overlay of individual EPSCs (gray) and average (colored) for each amplitude bin.

B. Example trace of EPSCs exhibiting stereotypic shapes and amplitudes in three clusters, corresponding to each amplitude bin in A.

C. Auto-correlogram of all EPSCs recorded from the VS neuron (top, black) or divided into three clusters based on EPSC amplitudes (bottom, colored). A refractory period around 0 ms only occurs for EPSCs within each cluster, but not across all EPSCs.

D. Schematic of three different otolith afferents converging onto one VS neuron, each eliciting EPSCs with a distinct amplitude (represented by different synaptic sizes). Right, spike activities of three afferents inferred from B.

156 the EPSCs elicited by that afferent should exhibit a refractory period as well. An auto-  
157 correlogram of all EPSC event times in this example neuron did not display a refractory  
158 period (Fig. 3C, top). In contrast, an auto-correlogram within each EPSC cluster  
159 exhibited a clear refractory period around 0 ms (Fig. 3C, bottom). Furthermore, cross-  
160 correlograms between EPSC clusters did not show this structure, consistent with the  
161 notion that they arise from independent inputs (Fig. S3). Accordingly, we can interpret  
162 these three EPSC clusters as deriving from the activity of three distinct presynaptic  
163 afferents (Fig. 3D, left). Because of the high fidelity of electrical transmission, each  
164 EPSC cluster effectively reads out the spiking of an individual afferent, allowing us to  
165 measure presynaptic activity via postsynaptic recording (Fig. 3D, right).

166 To test this interpretation of electrophysiological data with a completely  
167 independent approach, we reconstructed the whole volume of myelinated utricular  
168 inputs onto 11 VS neurons from a high resolution re-imaged serial section EM dataset  
169 acquired from the right side of one 5.5 dpf larval zebrafish (Fig. 4A, B). We found that  
170 the connection between myelinated utricular afferents and VS neurons was relatively  
171 sparse. All VS neurons were contacted by at least two utricular afferents, but some  
172 afferents did not innervate any VS neurons (Fig. 4C). These reconstructions showed  
173 that a range of 2-6 afferents (mean $\pm$ std:  $3.4\pm 1.4$ ) converged onto each VS neuron (Fig.  
174 4D). We compared these numbers to those derived from whole-cell physiology, where  
175 we inferred the number of convergent afferents from the number of EPSC clusters.  
176 Across all VS neuron recordings, we found a range of 0-5 afferents ( $1.7\pm 1.3$ ) converged  
177 onto each VS neuron (Fig. 4E). The result from anatomical reconstruction is largely  
178 consistent with the overall distribution of afferent contacts as measured by whole-cell  
179 physiology, presumably with some small-amplitude EPSCs elicited by the afferents not  
180 successfully clustered. Therefore, these results demonstrate that synaptic inputs from  
181 individual vestibular afferents can be separated by their stereotypic EPSC waveforms,  
182 yielding inferred afferent convergence consistent with high-resolution anatomical  
183 connectivity.

#### 184 **Spatial tuning of inferred otolith afferents**

185 By recording from one VS neuron, we can infer the activity of its presynaptic  
186 afferents. This approach thus offers a unique opportunity to measure the sensory tuning  
187 of several convergent afferents simultaneously. To determine the spatial tuning of  
188 convergent afferent inputs, we delivered 2 Hz,  $\pm 0.02$  g sinusoidal translational stimuli  
189 on four axes in the horizontal plane and recorded the sensory-evoked EPSCs, as  
190 shown for an example VS neuron (Fig. 5A). In this example neuron, the inferred  
191 utricular afferent (EPSC cluster) with the largest synaptic amplitude responded best to  
192 caudally-directed acceleration, while two others responded with varying sensitivities to  
193 rostrally-directed acceleration, in all cases with phase leads relative to peak  
194 acceleration (Fig. 5B). With these measurements, we can derive the preferred tuning  
195 direction, gain and phase of each afferent, as represented by the direction and length of  
196 a vector (Fig. 5B, right). To validate the consistency of the vectorial representation, we  
197 used a previously established approach (Schor et al., 1984) to quantify the tuning  
198 vectors with separately measured responses to two circular stimuli (Fig. S4 B), which



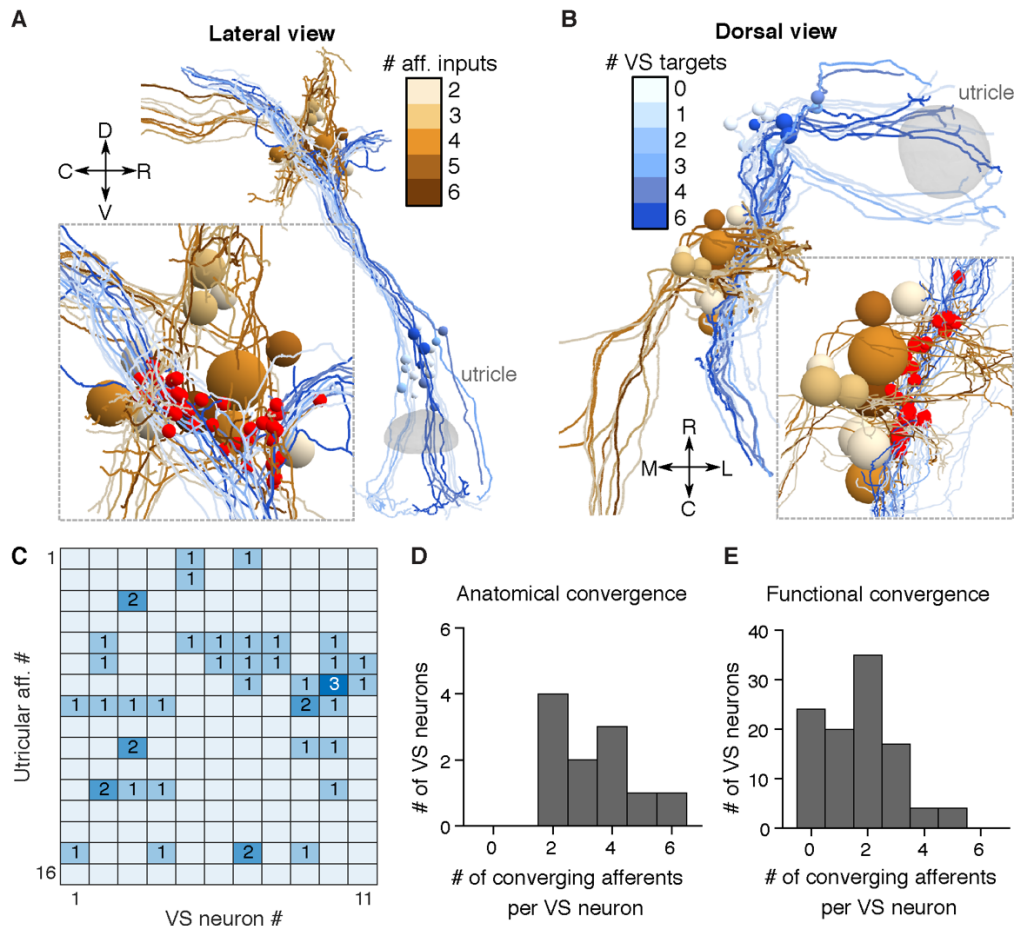

**Figure 4: Anatomical reconstruction reveal similar convergence pattern as physiology**

**A.** Serial-section EM reconstruction (lateral view) of all myelinated utricular afferents (blues) and VS neurons (browns) on the right side of one animal (5.5 dpf). Inset, identified synaptic contacts between afferents and VS neurons (red). Color scale represents number of distinct afferents synapsing with a given VS neuron (browns). VS neurons with greater number of afferent inputs are located more ventrally.

**B.** Dorsal view of the same reconstruction as A. Color scale represents number of VS neurons contacted by a given afferent (blues).

**C.** Number of distinct synaptic contacts from each utricular afferent onto each VS neuron, based on serial-section EM reconstruction.

**D.** Histogram of the numbers of distinct afferents converging onto each VS neuron, as measured by serial-section EM reconstruction (11 neurons, 1 fish)

**E.** Histogram of the numbers of distinct afferents converging onto each VS neuron, as inferred from whole-cell physiology recording (104 neurons, 89 fish)

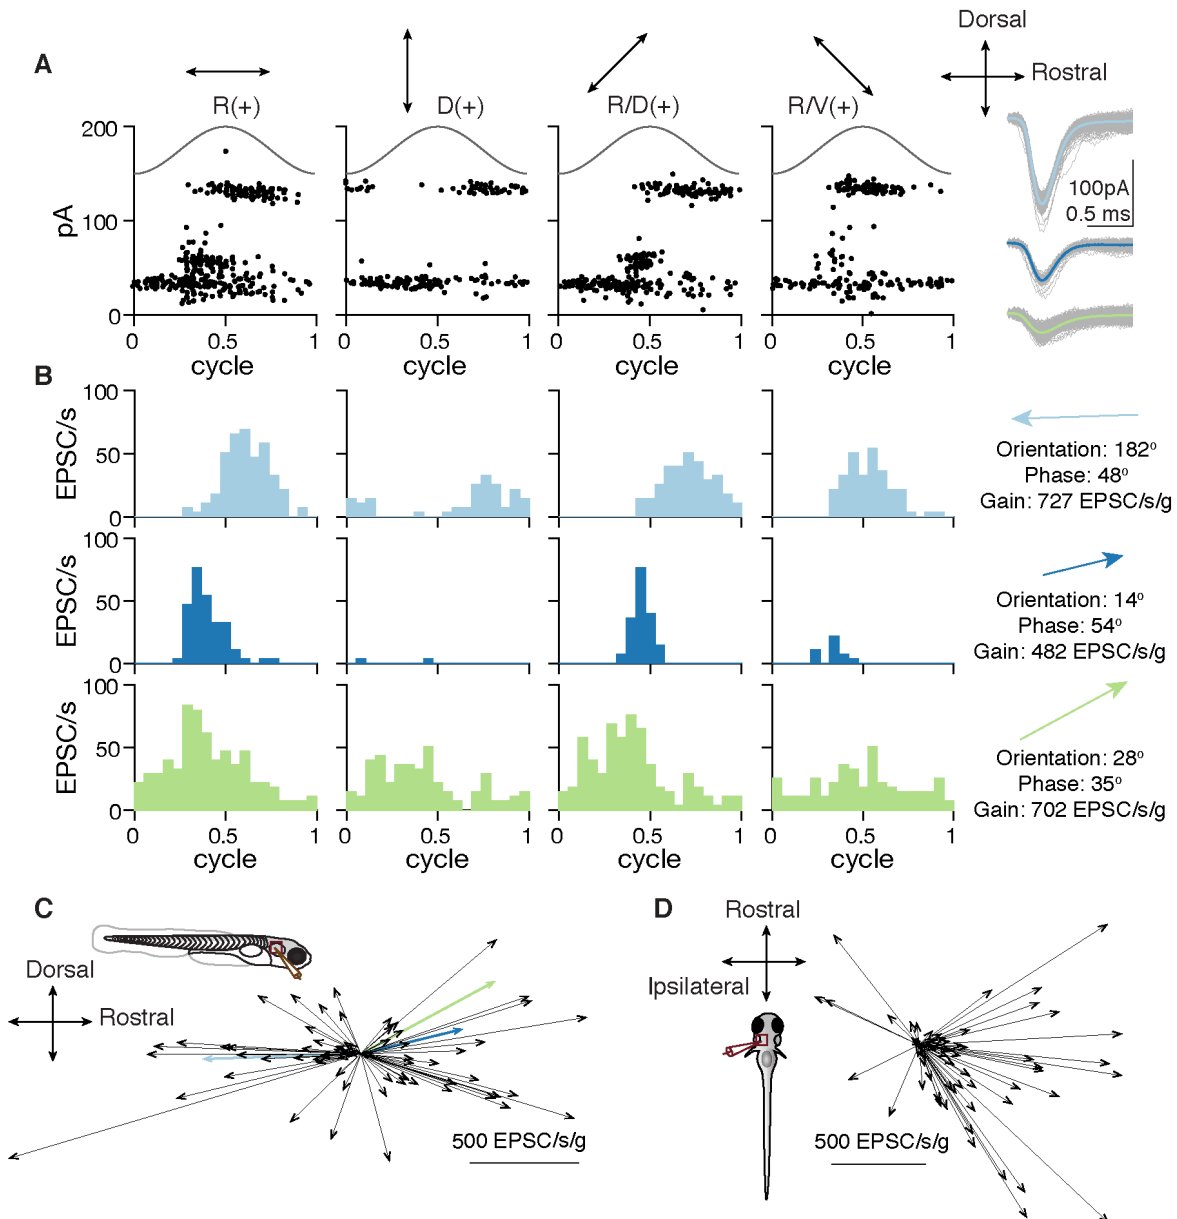

**Figure 5: Spatial tuning of inferred otolith afferents**

**A.** EPSC responses of an example neuron in response to 2 Hz, 0.02 g translational stimuli (solid sinusoidal line, acceleration) on 4 different axes (top, arrows). Each dot represents one EPSC; note three EPSC clusters with distinct amplitudes. Right, overlay of individual EPSCs (gray) and average (colored) for each cluster.

**B.** EPSC tuning of three clusters. Right, vectors representing the maximum tuning direction, phase, and gain of each inferred afferent corresponding to an EPSC cluster.

**C.** Maximum tuning directions of all afferents from VS neurons recorded from fish oriented side-up. Colored arrows represent tuning of afferents in B (69 afferents, 43 neurons, 33 fish)

**D.** Maximum tuning directions of all inferred afferents from VS neurons recorded from fish oriented dorsal-up. (60 afferents, 36 neurons, 36 fish)

199 showed similar preferred directions as those measured by translational stimuli (Figs. S4  
200 A-C). Across all recordings with the animal oriented side-up, tuning of afferents was  
201 strong in the rostral (30/69) and caudal (31/69) directions, but relatively weak in the  
202 dorsal (4/69) and ventral (4/69) directions, as represented by an overlay of all inferred  
203 afferent tuning vectors (Fig. 5C). When fish were oriented dorsal-up, the axes tested  
204 were rostral-caudal and ipsilateral-contralateral (motion along an axis from one ear to  
205 the other). In this position, most afferents were strongly tuned to acceleration towards  
206 the contralateral direction (31/60), some exhibited preferential tuning to the acceleration  
207 to the rostral (4/60) and caudal (20/60) directions, and only 5/60 afferents were tuned to  
208 the ipsilateral direction (Fig. 5D). These results showed that each afferent in the larval  
209 zebrafish exhibits selective responses to different translational stimuli. Afferents overall  
210 responded best to acceleration towards the contralateral, rostral and caudal directions,  
211 which correspond to ipsilateral, nose-up and nose-down tilts in postural change  
212 (Angelaki and Cullen, 2008), consistent with the distribution of hair cell polarity in the  
213 utricular macula (Haddon et al., 1999).

#### 214 **Temporal tuning of inferred otolith afferents**

215 The sensitivity and phase of vestibular afferents varies for motion at different  
216 frequencies (Fernandez and Goldberg, 1976b). The tuning of otolith afferents ranges  
217 from typically more jerk-encoding (derivative of acceleration) at low frequencies to more  
218 acceleration-encoding at high frequencies. What temporal tuning profile do afferents in  
219 larval zebrafish exhibit? We applied translational stimuli with different frequencies (0.5-8  
220 Hz,  $\pm 0.02$  g) on the rostral-caudal axis. In the example neuron, all three inferred otolith  
221 afferents showed similar tuning, with progressively stronger responses with increasing  
222 frequencies of stimulation (Fig. 6A). Across group data acquired at both  $\pm 0.02$  g and  
223  $\pm 0.06$  g, the average tuning gain increased 3.3-fold (0.02 g) and 2.3-fold (0.06 g) from  
224 0.5 Hz to 8 Hz (Fig. 6B). Most afferents (39/48) showed at least 2-fold increase from 0.5  
225 Hz to 4 Hz in tuning gain at either 0.02 g or 0.06 g. Only one afferent had relatively flat  
226 gain (< 50% increase) at both 0.02 g and 0.06 g, and its tuning was overall weak (mean  
227 gain: 1.88 and 2.24 EPSC/s respectively), suggesting it was less sensitive or not tuned  
228 on the rostral-caudal axis. Regardless of tuning direction (rostral: 44%, 21/48; caudal:  
229 56%, 27/48), afferents exhibited a phase lead relative to peak acceleration at various  
230 tested stimulus magnitudes and frequencies ((Fig. 6C, S5). On average, the phase lead  
231 at low frequency (0.5 Hz) was  $84.0^\circ$  for 0.02 g and  $78.6^\circ$  for 0.06 g. At high frequency (8  
232 Hz), the phase lead was reduced to  $33.6^\circ$  for 0.02 g and  $39.3^\circ$  for 0.06 g. The temporal  
233 dynamics of the afferents resembled those of previously reported irregular units  
234 (Goldberg et al., 1990), with low spontaneous firing rates ( $10.28 \pm 9.1$  EPSC/s) and  
235 larger coefficients of variation (CV). The average CV across inferred afferents was  
236  $0.97 \pm 0.24$ , and the smallest CV was 0.5 (Fig. S6), indicating that no regular-firing otolith  
237 afferents were detected synapsing onto VS neurons. We conclude that the otolith  
238 afferents act as a high-pass filter, encoding a mixture of acceleration and jerk, similar to  
239 otolith afferents in primates (Laurens et al., 2017).

#### 240 **Preferential convergence**

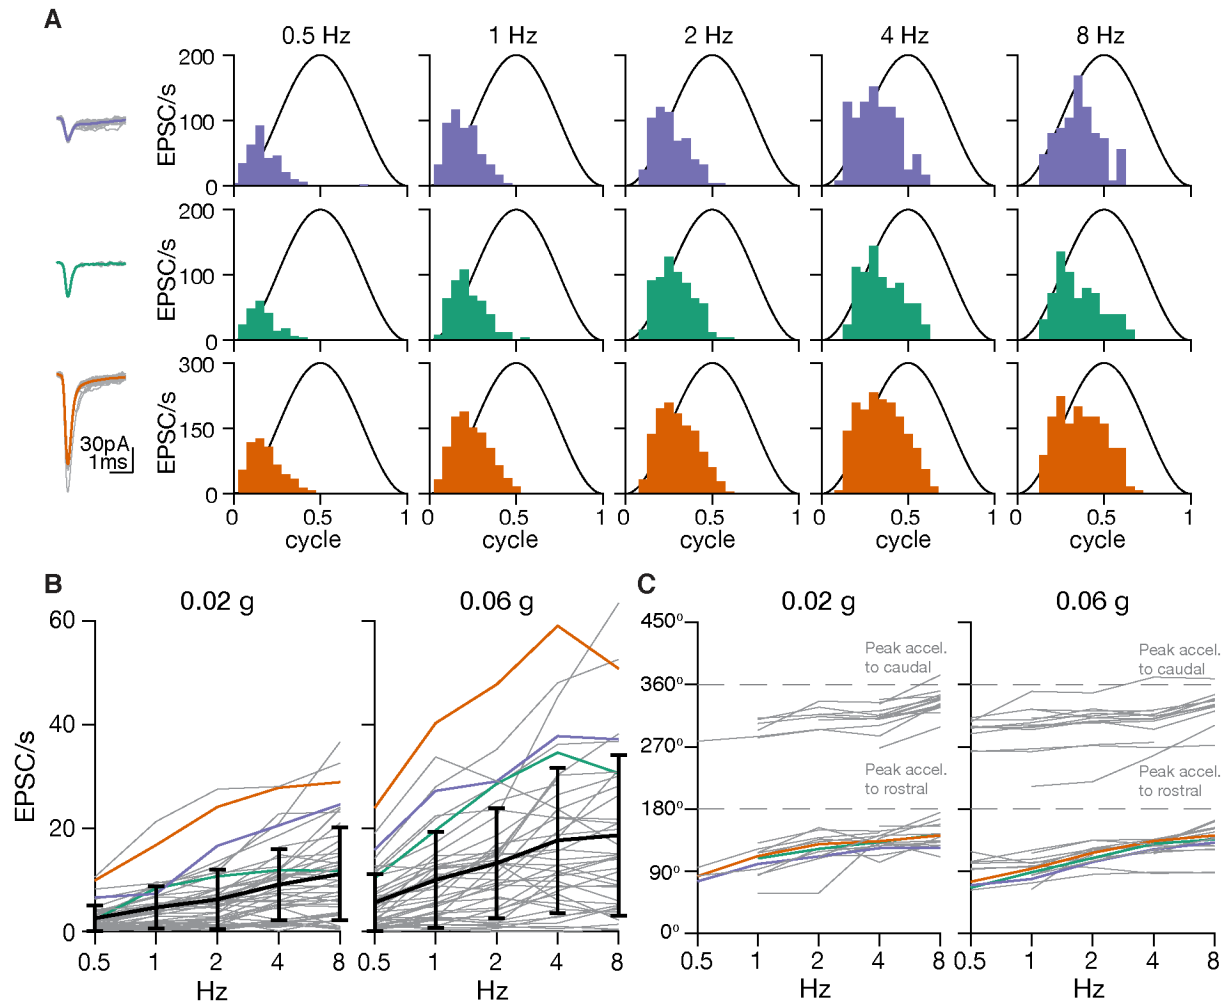

**Figure 6: Temporal tuning of inferred otolith afferents**

**A.** Sensory tuning of afferent inputs to one VS neuron during translational movement at 5 different frequencies in the rostral(+)-caudal(-) axis. Left, EPSC waveforms of three different clusters recorded from one VS neuron. Right, temporal tuning profile of each EPSC cluster on the rostral-caudal axis.

**B.** Gains of inferred afferents across different frequencies of translational acceleration. Gray, individual afferents; colored, afferents from A; black, mean and standard deviation of gains from all afferents (0.02 g, 48 afferents; 0.06 g: 46 afferents; 25 neurons, 20 fish)

**C.** Phases of inferred afferents across frequencies, relative to sinusoidal stimulus. 180° (0.5 cycle in A) represents the peak of acceleration towards rostral direction; 360° represents the peak of acceleration towards caudal direction (0 or 1 cycle in A). Data were thresholded to only include afferents whose gain was > 5 EPSC/s (0.02 g, 36 afferents; 0.06 g, 38 afferents; 25 neurons, 20 fish)

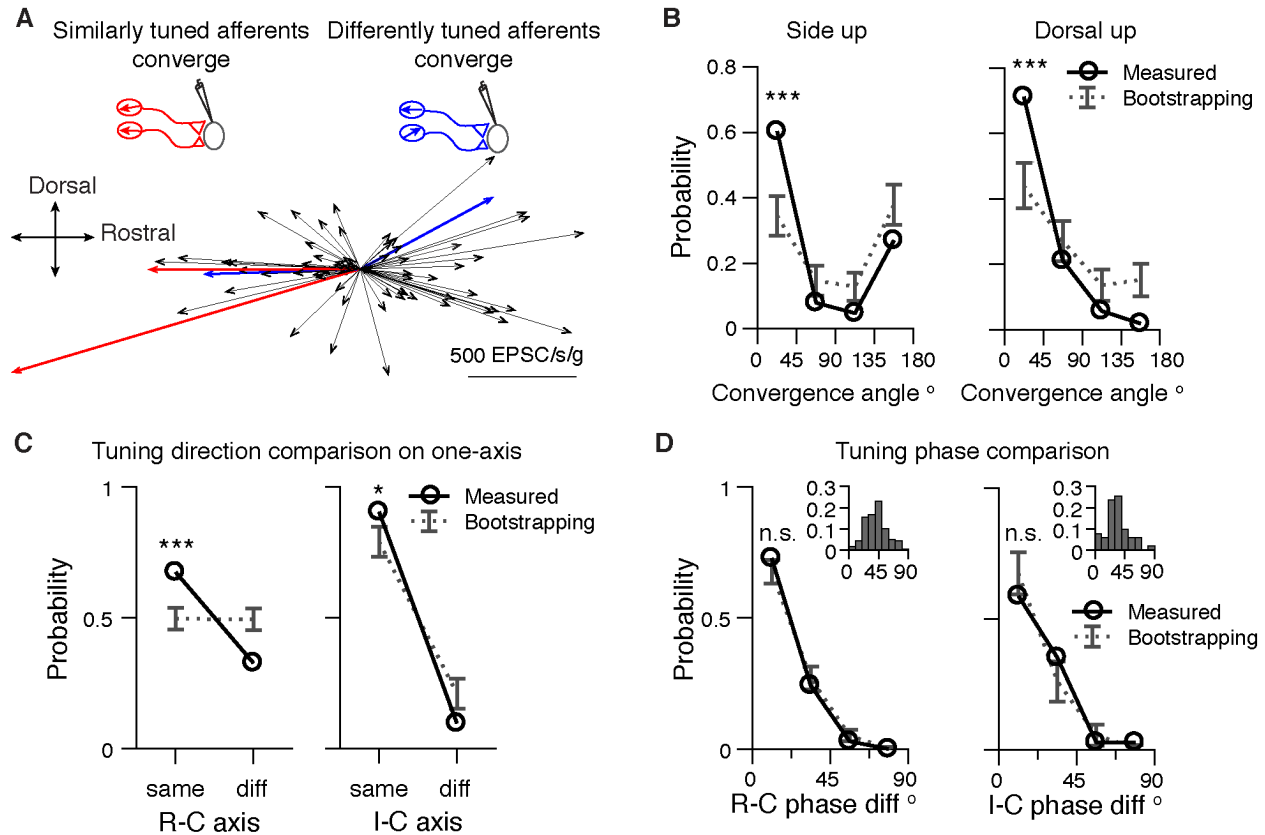

**Figure 7: Afferents with similar tuning direction preferentially converge**

**A.** Example of two pairs of converging afferents from two VS neurons in side-up fish. Red, converging afferents are similarly tuned, with small convergent angle between the pair; Blue: converging afferents are differently tuned, with large convergent angle between the pair.

**B.** Probability distribution of converging angles for measured and randomly generated afferents pairs in side up fish and dorsal up fish. Two tailed z-test, side up, 0-45°:  $p=2e-5$ , 135-180°:  $p=0.08$ . (63 afferent pairs); dorsal up, 0-45°:  $p=8e-5$ , 135-180°:  $p=0.007$ . (52 afferent pairs)

**C.** Probability distribution of converging afferents tuned to the same direction vs different direction, on the rostral-caudal and ipsilateral-contralateral axis. Two tailed z-test, R-C, same:  $p=1e-5$ , diff:  $p=4e-5$  (150 afferent pairs); I-C, same:  $p=0.044$ , diff:  $p=0.044$  (52 afferent pairs).

**D.** Probability distribution of phase difference for converging afferents, on the rostral-caudal and ipsilateral-contralateral axis. Two tailed z-test, R-C, 0-22.5°  $p=0.26$  (103 afferent pairs); I-C, 0-22.5°,  $p=0.28$  (34 afferent pairs). Inset: distribution of tuning phase of afferents, R-C, 177 afferents; I-C, 60 afferents; 90° represents the peak of acceleration of preferred direction (2 Hz, 0.02 g).

241 Individual VS neurons can receive inputs from afferents with similar (Fig. 6A) or  
242 different tuning (Fig. 5B). Is afferent tuning convergence random or structured? The  
243 responses of inferred afferents that converge onto the same VS neuron were  
244 represented by their tuning vectors (Fig. 7A). The angle between the vectors indicates  
245 the similarity of convergent inputs, with a small angle for a VS neuron with similarly  
246 tuned inputs and a large angle for a VS neuron with differently tuned inputs. From 43  
247 VS neurons recorded in the side-up orientation, 60% (38/63) of converging afferent  
248 pairs had small angles ( $<45^\circ$ ) and 27% (17/63) had large angles ( $>135^\circ$ ). Compared to  
249 a random pairing angle distribution generated by bootstrapping, the percentage of  
250 similarly tuned convergent afferent pairs was significantly higher than chance (Fig. 7B,  
251 left). From 36 VS neurons recorded in the dorsal-up orientation, there were 71% (37/52)  
252 of inferred afferent pairs with a converging angle smaller than  $45^\circ$ , and only 2% (1/52)  
253 with a converging angle larger than  $135^\circ$  due to the small number of ipsilaterally tuned  
254 afferents (Fig. 5D). Nonetheless, the probability of similarly tuned afferent convergence  
255 ( $<45^\circ$ ) was significantly higher than that chance (Fig. 7B, right). For afferent pairs with  
256 converging angle larger than  $45^\circ$  ( $45^\circ$ - $90^\circ$ ,  $90^\circ$ - $135^\circ$ ,  $135^\circ$ - $180^\circ$ ), their probabilities was  
257 slightly lower than their respective estimated distribution by bootstrapping. Accordingly,  
258 on a given body axis (R-C or I-C), convergent afferents are also more likely to encode  
259 similar tuning directions (Fig. 7C). These results suggest that afferents with similar  
260 tuning direction preferentially converge at rates exceeding what would be expected by  
261 random connectivity.

262 Do converging afferents also have similar tuning phase regardless of their tuning  
263 direction? Most afferents are phase-leading with 2 Hz, 0.02 g stimulation (Figs. 6 and  
264 7D, inset), and the phase difference between afferents is small (R-C:  $41^\circ \pm 16^\circ$ ,  $n=177$ ,  
265 I-C:  $33^\circ \pm 17^\circ$ ,  $n=60$ ). Consequently, most afferent pairs (R-C,  $68 \pm 4.6\%$ ; I-C,  $68 \pm 8\%$ )  
266 selected randomly have very small phase difference (phase diff.  $< 22.5^\circ$ ) (Fig. 7D). Both  
267 the probability of converging afferents having similar phase (phase diff.  $< 22.5^\circ$ ) (R-C,  
268 73%, 75/103; I-C, 59%, 20/34) and the cumulative distribution (Fig. S7) lay within the  
269 bootstrap predications on the rostral-caudal and ipsilateral-contralateral axes.  
270 Therefore, tuning phase between converging afferent pairs is similar, in accordance with  
271 their relatively homogeneous distribution.

272 In conclusion, we found that afferents forming synaptic connections with the  
273 same postsynaptic VS partner typically have similar spatiotemporal tuning properties. In  
274 particular, afferents with similar tuning direction preferentially converge, which explains  
275 the long-standing observation that most VS neurons exhibit simple cosine tuning  
276 (Peterson, 1970, Schor et al., 1984). However, a non-negligible number of VS neurons  
277 receive convergent input from differently tuned afferents, a potential source for the  
278 complex spatiotemporal tuning of central vestibular neurons.

### 279 **Complexity of central tuning is determined by the similarity of afferent inputs.**

280 Complex sensory tuning of central neurons is thought to arise from convergence  
281 of more simply tuned inputs with differing spatial and temporal properties, in vestibular  
282 (Angelaki et al., 1993), as well as visual (Jia et al., 2010) and somatosensory (Petersen,  
283 2007, Roy et al., 2011) systems. For example, complex tuning such as bidirectional

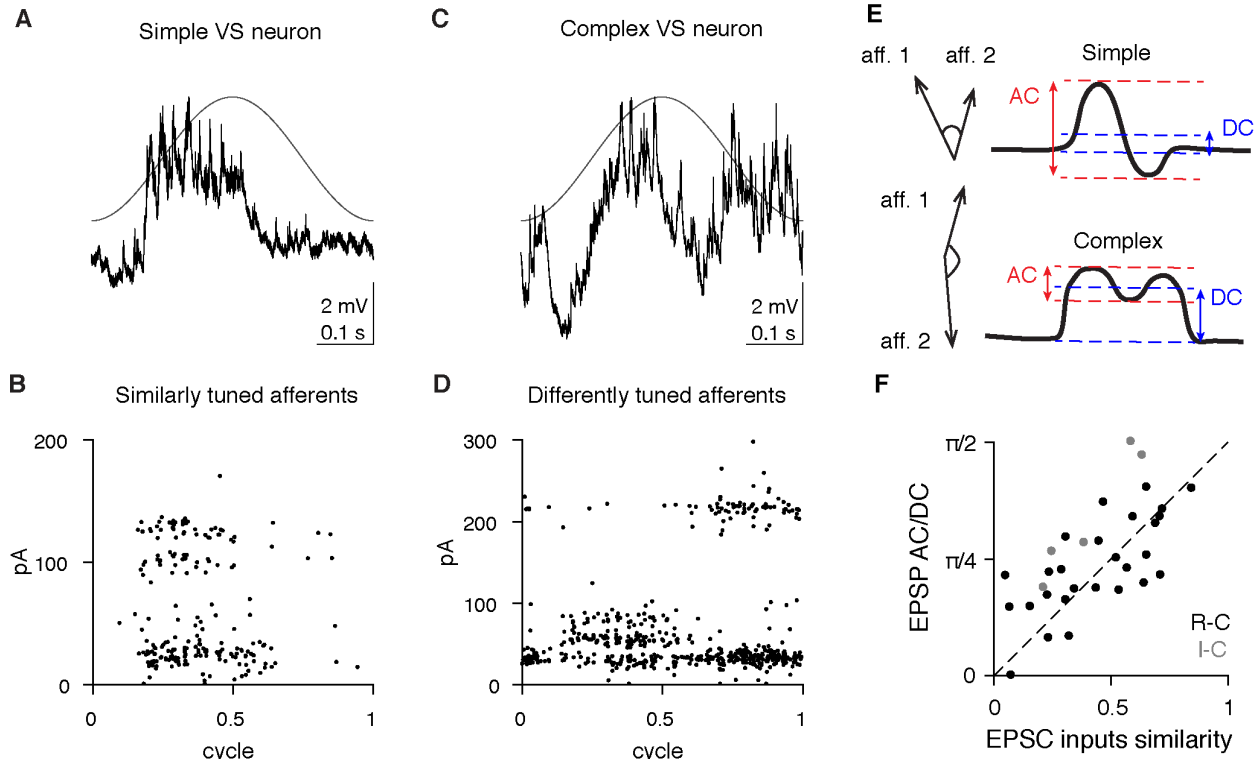

Figure 8: Subthreshold tuning responses of VS neurons are explained by the similarity of tuning of afferent inputs

A. Average membrane potential change in a VS neuron with simple response to 2 Hz, 0.02 g translational movement on the rostral(+)-caudal(-) axis.

B. EPSC responses for the simple cell shown in A. All inferred afferents exhibit similar tuning.

C. Average membrane potential change in a VS neuron with complex subthreshold response to 2 Hz, 0.02 g translational movement on the rostral(+)-caudal(-) axis

D. EPSC responses for the complex cell shown in B. Different inferred afferents exhibit distinct tuning, as shown by the different temporal responses of the large amplitude and medium amplitude EPSCs.

E. Schematic of different magnitudes of AC and DC responses in a simple and complex cell. Left, the hypothesized models of similarly tuned or differently tuned convergent afferent inputs underlying simple or complex responses, respectively.

F. Correlation of EPSC inputs similarity index and EPSP AC/DC response ratio (see Methods), for all non-spiking VS neurons with multiple convergent afferents. Sensory tuning of afferent inputs and EPSPs was measured on the R-C axis (black, n=27) and I-C axis (grey, n=5). Dashed, unity line. Pearson's R: 0.67

284 (Peterson, 1970) and broadly tuned sensory responses (Angelaki, 1992) of central  
285 vestibular neurons can be computationally reconstructed from multiple modelled cosine-  
286 tuned inputs. However, directly measuring these inputs has been technically difficult,  
287 and it is unclear whether such models can sufficiently explain the activity of central  
288 neurons. Therefore, we took advantage of the inferred afferent spiking to examine  
289 whether the tuning of VS neurons can be constructed from the convergence of otolith  
290 afferents.

291 We observed that different VS neurons showed simple or complex membrane  
292 potential responses to translational stimuli on the rostral-caudal axis. An example  
293 simple cell was only depolarized during a specific phase of acceleration (Fig. 8A),  
294 whereas a complex cell exhibited multiple depolarized periods during the stimulus (Fig.  
295 8C). Next, we measured the EPSC tuning in the same VS neurons. In the example  
296 simple neuron, sensory evoked EPSCs exhibit three distinct amplitudes (Fig. 8B),  
297 indicating three afferents converge onto the cell. These three afferents showed similar  
298 tuning to each other, with strongest responses for rostrally-directed acceleration. In  
299 contrast, the four inferred afferents that converge onto the example complex cell  
300 exhibited a different tuning pattern. Two afferents were tuned to rostrally-directed  
301 acceleration and the other two to caudally-directed acceleration (Fig. 8D).

302 To examine this relationship across the population, we defined an afferent inputs  
303 similarity index for multiply innervated VS neurons, based on the phase of afferent  
304 inputs and their EPSC amplitudes. The index ranges from 0-1, with smaller index  
305 representing more divergent EPSC input tuning and larger index representing more  
306 similar tuning (see Methods). A classifier originally developed for visual cortical neurons  
307 was used to quantify the tuning complexity of the postsynaptic neuron's membrane  
308 potential responses to sensory stimuli (Skottun et al., 1991). In this metric, neurons with  
309 simple tuning show large AC and small DC responses, whereas complex cells exhibit  
310 small AC and large DC responses (Fig. 8E). We found that the AC/DC ratio of the  
311 membrane potential was strongly correlated with the similarity index of afferent inputs  
312 (Fig. 8F). In other words, convergence of more similarly tuned afferents yields a more  
313 simple VS neuron response, and the convergence of more differently tuned afferents  
314 generates a more complex postsynaptic response.

### 315 **Spike tuning generation from similar and differently tuned afferents.**

316 We next extended the comparison of presynaptic to postsynaptic tuning by  
317 measuring the spiking responses of VS neurons during sensory stimulation. In a subset  
318 of VS neurons, the largest translational stimuli that we could deliver while holding the  
319 cell was sufficient to evoke postsynaptic firing; in other neurons, a small bias current  
320 was injected to evoke spiking during sensory stimulation (see Methods). Most VS  
321 neurons exhibited simple spike tuning, and received convergent inputs from similarly  
322 tuned afferents (Fig. 9A). Some VS neurons with simple spike responses received  
323 convergent inputs from differently tuned afferents (Fig. 9B). Finally, complex spike  
324 tuning in VS neurons was always generated by inputs from differently tuned afferents  
325 (Fig. 9C). These three categories of input-output transformation (similar to simple,  
326 different to simple, different to complex) were identified across all recordings from VS



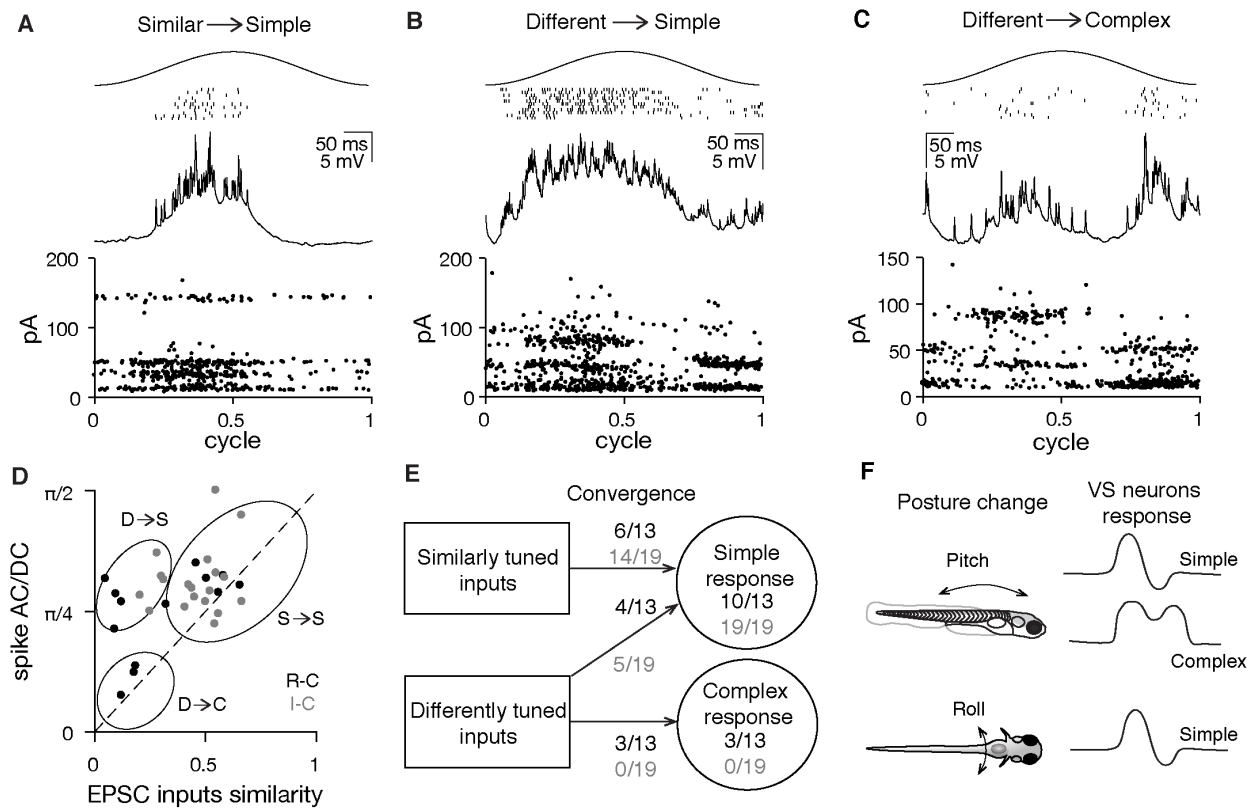

Figure 9: Spiking tuning complexity of VS neuron is partially explained by the similarity of tuning for the afferent inputs

A. Example cell showing that simple spiking tuning response is constructed from afferent inputs with similar tuning direction. Top, sensory-evoked spike raster of a VS neuron during 2 Hz, 0.02 g translational movement on the I(-)-C(+) axis (11 trials); middle, average membrane potential of the VS neuron (11 trials); bottom, sensory-evoked EPSC response (12 trials); each dot represents one EPSC.

B. As in A, for an example cell showing simple spiking tuning response arising from afferent inputs with different tuning directions on the I(-)-C(+) axis.

C. As in A, for an example cell with a complex spiking tuning response due to afferent inputs with different tuning directions on the R(+)-C(-) axis.

D. Correlation of EPSC input similarity index and spike activity AC/DC ratio, for all spiking VS neurons on the R-C axis (black, n=13 recordings) and I-C axis (gray, n=19). Circles, three categories of input-output transformation, corresponding to examples in A, B and C. Dashed, unity line. Pearson's R: 0.51

E. Quantification of input-output transformation of VS neurons; Ns represent individual cells.

F. Summary of different responses of VS neurons responding to posture change on the pitch and roll axes.

327 neurons (Fig. 9D). In total, most recordings (R-C, 6/13; I-C, 14/19) exhibited simple  
328 spike tuning, of which 69% (20/29) received inputs from similarly tuned afferents, and  
329 31% (9/29) received inputs from differently tuned afferents (Fig. 9E). Thus, convergence  
330 of similarly tuned afferents yields simple spike tuning, but convergence of differently  
331 tuned afferents can yield either simple or complex spike tuning. Interestingly, complex  
332 spike tuning was only observed on the R-C axis (3/13 recordings), which subserves  
333 pitch movements, not the I-C axis (0/19), which subserves roll (Fig. 9F). These results  
334 indicate that VS neurons may play different roles in maintaining body balance on  
335 different body axes.

## 336 Discussion

### 337 Sensory convergence in the central vestibular nuclei

338 Taking advantage of the invariant synaptic transmission of electrical synapses,  
339 we separated distinct afferent inputs that converge onto VS neurons and measured the  
340 spatial and temporal tuning of each converging afferent *in vivo*. This analysis is  
341 facilitated by the sparseness of connectivity, with < 6 afferents synapsing with each VS  
342 neuron. These data resolve a conflict in the literature: anatomically, very few otolith  
343 afferent terminals are observed in the lateral vestibular nucleus (Newlands and  
344 Perachio, 2003), but physiologically, afferent stimulation elicits monosynaptic EPSPs in  
345 VS neurons (Boyle et al., 1992). Our data reveal that sparse but powerful afferent  
346 synaptic contacts, located on the lateral dendrites of VS neurons, are sufficient to drive  
347 the membrane potential of the cell during sensory stimulation. Although these large  
348 afferent inputs drive sensory responses, VS neurons receive a wealth of non-vestibular  
349 synaptic contacts on their large dendritic arbors. This is consistent with previous  
350 findings that the activity of VS neurons is regulated by locomotion (Orlovsky, 1972),  
351 proprioception (Neuhuber and Zenker, 1989), and other inputs (Sarkisian, 2000, Witts  
352 and Murray, 2019). Interestingly, lateral geniculate neurons (LGN) of the visual  
353 thalamus display a similar pattern of connectivity, with sparse, powerful afferent inputs  
354 from retinal ganglion cells and weaker, diverse inputs from other sources (Usrey et al.,  
355 1999, Sherman, 2005). Our findings suggest that this configuration is common to VS  
356 neurons as well.

357 Similarly tuned otolith afferents preferentially converge onto VS neurons (Fig. 7),  
358 demonstrating that feedforward excitation can generate central neurons with simple  
359 response properties. In a similar vein, thalamocortical inputs with similar angular tuning  
360 also preferentially project onto the same site in somatosensory cortex, and the preferred  
361 tuning direction of the cortical neuron can be predicted by that of the presynaptic  
362 thalamic neuron (Bruno et al., 2003). Furthermore, we found that convergence of  
363 differently tuned afferents can yield a more complex postsynaptic response in central  
364 vestibular neurons, similar to bidirectional or complex tuning observed previously in cats  
365 (Peterson, 1970) and primates (Angelaki and Dickman, 2000). This result generally  
366 supports the hypothesized model (Angelaki, 1992) that the tuning of central vestibular  
367 neurons can be constructed from cosine tuned inputs with varying tuning properties.  
368 However, we find that convergence of differently tuned afferents can also yield simple  
369 tuning in VS neurons (Fig. 8B), suggesting other factors such as inhibition (Straka and

370 Dieringer, 1996) and thresholding (Priebe et al., 2004) might be involved. We found no  
371 evidence for polysynaptic excitatory circuits during afferent stimulation (Fig. S9 A and  
372 B), and modelling indicates that excitatory synaptic input is sufficient to predict  
373 subthreshold membrane potential and tuning (Fig. S9 C-F). However, stronger stimuli  
374 might elicit inhibition and other nonlinearities. Across brain regions, sensory tuning of  
375 central neurons is constructed by a variety of mechanisms. These include afferent  
376 convergence pattern (Alonso and Martinez, 1998, Priebe and Ferster, 2012), local  
377 excitatory or inhibitory modulation (Wilent and Contreras, 2005), and nonlinear dendritic  
378 computation (Lavzin et al., 2012). Our results demonstrate that sensory response of a  
379 central neuron can be constructed from the afferent inputs in a direct feedforward  
380 manner.

### 381 **Otolith afferent tuning properties in the larval zebrafish**

382 The derived spatial tuning profile of afferents in the larval zebrafish is similar to  
383 the polarity of the hair cells in otolith macula, consistent with results in fish (Fay, 1984,  
384 Platt, 1977) and primates (Fernandez et al., 1972). Notably, tuning to dorsal or ventral  
385 acceleration was relatively weak for most afferents, presumably due to the horizontal  
386 orientation of the utricular membrane in larval zebrafish inner ear. Afferents were  
387 preferentially tuned to contralateral acceleration (ipsilateral tilt) in the roll axis, consistent  
388 with the dearth of ipsilaterally tuned hair cells in larval zebrafish (Haddon et al., 1999).  
389 In species with more centrally located line of polarity reversal (Fernandez and Goldberg,  
390 1976a, Tomko et al., 1981), we would predict more convergence of oppositely tuned  
391 afferents, and correspondingly more complex response of VS neurons in the roll axis,  
392 as seen in cats (Peterson, 1970).

393 A significant question in vestibular systems is whether central vestibular neurons  
394 receive selective projections from afferents with regular as opposed to irregular firing.  
395 Both regular and irregular afferents are thought to converge on VS and vestibulo-ocular  
396 reflex neurons in mammals, based on studies comparing recruitment thresholds of  
397 afferent inputs (Boyle et al., 1992). Our data provide direct evidence that vestibular  
398 inputs to VS neurons exhibit classic characteristics of irregular afferents (Eatock and  
399 Songer, 2011): high-pass tuning, low spontaneous firing rate, and high CV of firing (Fig.  
400 S6). It is unknown whether regular utricular afferents exist in the larval zebrafish.  
401 Although regular utricular afferents were observed in guitarfish (Budelli and Macadar,  
402 1979), they appear absent in toadfish (Maruska and Mensinger, 2015) and sleeper goby  
403 (Lu et al., 2004). Based on serial section EM, many afferents make no contacts with VS  
404 neurons (Fig. 4C), leading us to conclude that either regular afferents have not yet  
405 developed or that they do not contact VS neurons in the larval zebrafish.

### 406 **Linear and fast synaptic transmission via gap junctions**

407 Our data reveal that electrical synapses mediate linear synaptic transmission  
408 from otolith afferents to the VS neurons. In contrast, synaptic transmission at  
409 retinotectal afferents in larval zebrafish is mediated solely by glutamate (Smear et al.,  
410 2007), suggesting that electrical synapses in vestibular afferents are perhaps not simply  
411 a feature of early larval development but play an important role in circuit computations,

412 potentially via their amplitude invariant transmission. Interestingly, mammalian  
413 vestibular afferent synapses also exhibit amplitude invariant transmission in the medial  
414 vestibular nucleus (Bagnall et al., 2008) and cerebellum (Arenz et al., 2008, Chabrol et  
415 al., 2015), but via specialized glutamatergic terminals (Turecek et al., 2017, McElvain et  
416 al., 2015), indicating that frequency-independent transmission is a hallmark of vestibular  
417 signaling across vertebrates. Furthermore, mixed electrical and chemical synapses  
418 have been anatomically identified between vestibular afferents and VS neurons in both  
419 adult fish (Korn et al., 1977) and rodents (Nagy et al., 2013), suggesting the mixed  
420 synapse may be a conserved mechanism across species to implement fast, frequency-  
421 independent transmission in the lateral vestibular nucleus. The amplitude invariance of  
422 this connection allowed us to examine whether there was any relationship between an  
423 afferent's sensory gain or firing rate and the synaptic amplitude it evokes in a VS  
424 neuron. No correlation appeared in either of these measures (Fig. S8), indicating that at  
425 least within this population, synapse size is not "normalized" by firing rate.

### 426 **VS pathway underlying sensorimotor transformation**

427 The VS pathway is important for posture control. Larval zebrafish swim at high  
428 frequencies up to 100 Hz (McLean and Fetcho, 2009) and are naturally unstable in  
429 water (Ehrlich and Schoppik, 2017). Our study examined the response of VS neurons  
430 with translational stimuli in the range of 0.04-0.12 g and 0.5-8 Hz, head movement  
431 parameters comparable to slow swimming (Voesenek et al., 2016) or small angle tilting  
432 motion in the larval zebrafish. In the roll axis all VS neurons are tuned to ipsilateral tilt  
433 (Fig. S10), consistent with data from calcium imaging (Migault et al., 2018, Favre-Bulle  
434 et al., 2018), suggesting they might excite specific motor units in the spinal cord to  
435 produce compensatory movements (Bagnall and McLean, 2014). On the pitch axis, VS  
436 neurons have more heterogeneous responses, including simple tuning to either rostral  
437 or caudal acceleration (Fig. S10), as well as complex responses (Fig. 9E) to both  
438 directions. Thus, when the animal is destabilized by excessive nose-up or nose-down  
439 tilts, VS neurons might activate non-specific motor units, increasing the likelihood of  
440 swim bouts to regain balance (Ehrlich and Schoppik, 2017).

441 The high-pass tuning and phase lead of otolith afferents innervating VS neurons  
442 will make larvae most sensitive to ongoing changes in tilt or acceleration, especially at  
443 high frequency. These data are consistent with behavioral observations that larvae  
444 become more likely to swim to correct their position in the pitch axis when angular  
445 velocity (i.e., changing tilt) reaches a critical threshold (Ehrlich and Schoppik, 2017).  
446 This compensatory postural adjustment, which relies on both trunk and fins, is absent in  
447 *rock solo* larvae (Ehrlich and Schoppik, 2019), in line with our results on the absence of  
448 sensory tuning in those animals. Larval VS neurons receive similar amounts of inputs  
449 from rostrally and caudally tuned afferents, suggesting both nose-up and nose-down  
450 tilts are equally detected by the VS pathway. In contrast, the vestibulo-ocular pathway  
451 shows an anatomical bias for representation of nose-up body tilt (Schoppik et al., 2017).  
452 This indicates that different strategies might be involved to adjust body posture and eye  
453 position for pitch movements in larval zebrafish.

454 Moreover, it is important for animals to distinguish self-generated and external  
455 vestibular signals. We described the direct excitatory inputs from vestibular afferents  
456 onto the VS neurons during passive movements. How do self-generated motion signals  
457 modulate the activities of VS neurons? Projections from Purkinje cells in the cerebellum  
458 are thought to suppress sensory-evoked activity in VS neurons during voluntary self-  
459 motion (Cullen, 2019). In the future, it would be interesting to use *in vivo* whole-cell  
460 physiology to investigate how central vestibular neurons distinguish self-generated  
461 movements from passive movements.

## 462 **Methods:**

### 463 Fish lines and husbandry:

464 *Tg(nefma:LRL:Gal4)* was established by injecting the construct containing hsp70  
465 promoter (Kimura et al., 2014), and the insertion site was set at the upstream of the  
466 nefma gene with the CRISPR target sequence: CATCGACGGATCAATGG. The  
467 *Tg(nefma:gal4)* fish line was generated by crossing *Tg(nefma:LRL:Gal4)* with a  
468 ubiquitous-Cre fish. The *otogc.1522+2T>A -/-* (rock solo) mutant is vestibular deficient  
469 due to a splice site mutation in *otogelin* (Mo et al., 2010, Roberts et al., 2017). Rock  
470 solo homozygotes on a *Tg(nefma:gal4, UAS:GFP)* background were crossed to rock  
471 solo WT/heterozygotes to produce clutches containing WT, heterozygotes and  
472 homozygotes for recording purposes. The rock solo homozygotes were identified by the  
473 absence of anterior otolith (utricle). All experiments and procedures were approved by  
474 the Animal Studies Committee at Washington University and adhere to NIH guidelines.

475 Animals were raised and maintained in the Washington University Zebrafish Facility at  
476 28.5°C with a 14:10 light:dark cycle. Larval zebrafish (4-7 dpf) were housed either in  
477 petri dishes or shallow tank with system water. Adult animals were maintained up to 1  
478 year old with standard procedure.

### 479 Electrophysiology:

480 VS neurons were targeted for whole-cell patch clamp recordings based on their  
481 characteristic position and fluorescence in the *Tg(nefma:gal4, UAS:GFP)* fish. The  
482 larvae (4-7 dpf) were paralyzed by 0.1%  $\alpha$ -bungarotoxin and embedded in a 10 mm  
483 FluoroDish (WPI) with low-melting point agarose (Complex SeaPlaque Agarose, 2.4%  
484 in system water). Fish were immersed in extracellular solution ([in mM] NaCl 134, KCl  
485 2.9, MgCl<sub>2</sub> 1.2, HEPES 10, glucose 10, CaCl<sub>2</sub> 2.1, osmolarity ~295 mOsm and pH ~  
486 7.5) and a small piece of skin above the brainstem was carefully removed by sharpened  
487 tungsten pins. The fish was transferred to an epifluorescence microscope equipped with  
488 immersion objectives (Olympus, 40x, 0.8 NA), infrared differential interference contrast  
489 optics and air-bearing sled recording table.

490 Patch pipettes (7-9 M $\Omega$ ) were filled with internal solution ([in mM] K gluconate 125,  
491 MgCl<sub>2</sub> 2.5, HEPES 10, EGTA 10, Na<sub>2</sub>ATP 4, Alexa Fluor 568 or 647 hydrazide 0.05-0.1,  
492 osmolarity ~295 mOsm and pH ~ 7.5). After whole-cell configuration was achieved,  
493 voltage clamp and current clamp signals were recorded at room temperature with a  
494 Multiclamp 700B, filtered at 10 kHz (current clamp) or 2 kHz (voltage clamp), digitized at

495 50 kHz with Digidata 1440 (Axon Instruments), and acquired by Clampex 10 (Molecular  
496 Devices).

497 Before the vestibular stimulus was delivered to the fish, the immersion objective was  
498 removed from the recording chamber. During the recording, series resistance was  
499 monitored every 15 s to ensure good recording quality; neurons with series resistance  
500 variation > 25% were discarded. After recording, the recorded cell was imaged with  
501 epifluorescence to confirm cell identity.

#### 502 Vestibular stimulation:

503 The recording rig was custom-designed to allow delivering user-controlled movement to  
504 the fish during recording without losing whole-cell access. The microscope and a one-  
505 axis or two-axis air-bearing sled (Aerotech, ABL1500WB or ABL1500&1500WB) were  
506 fixed on an air table. Manipulators (Microstar) and recording platform (ThorLab) were  
507 positioned on the sled. The sled was powered with the Aerotech transformers (TM5),  
508 NPdrivers (NDRIVECP10-MXU&NDRIVECP20-MXU) and nitrogen gas (Airgas, NI  
509 UHP300). Stimuli were designed in Matlab and imported into the program by Aerotech  
510 software (Motion Designer/Composer), with additional tuning as required to compensate  
511 for the motion of the underlying air table. Movement was recorded by an accelerometer  
512 (Sparkfun, ADXL335) attached to the platform. Motion signals were digitized at 50 kHz  
513 with Digidata 1440 (Axon Instruments), and acquired in Clampex 10 (Molecular  
514 Devices).

515 Fish were embedded either dorsal side up (movements on rostral-caudal and ipsilateral-  
516 contralateral axes) or left/right side up (movements on dorsal-ventral and rostral-caudal  
517 axes) and a series of frequency-varying sinusoidal translational stimulus was applied.  
518 The stimulus amplitude was set at 0.02 g or 0.06 g (min to max: 0.04 g or 0.12 g  
519 respectively), and stimulus frequency range was 0.5-8 Hz. For spatial tuning  
520 measurements, linear translation was applied on four different axes (0-180°, 45°-225°,  
521 90°-270°, 135°-315°) on the horizontal plane. To record spike tuning in neurons without  
522 spontaneous firing, a rheobase current was injected to depolarize the cell.

#### 523 Vestibular afferent stimulation and pharmacology

524 A glass pipette electrode (2-5 M $\Omega$ ) filled with extracellular solution ([in mM] NaCl 134,  
525 KCl 2.9, MgCl<sub>2</sub> 1.2, HEPES 10, glucose 10, CaCl<sub>2</sub> 2.1, osmolarity ~295 mOsm and pH ~  
526 7.5) was connected to a stimulator (A-M systems, Model 2100), and placed in the  
527 vestibular ganglion to stimulate the vestibular afferents. A train of 0.1 ms, 1  $\mu$ A - 1 mA  
528 electrical pulses at varying frequencies were delivered to elicit EPSCs in the recorded  
529 cells. At least 20 trials of evoked EPSCs were recorded to establish a stable baseline.  
530 AMPA receptors and gap junctions were blocked with 10  $\mu$ M NBQX and 500  $\mu$ M  
531 carbenoxolone, respectively.

#### 532 Electron Microscopy:

533 Ultrathin serial sections of brainstem from a 5.5 dpf zebrafish were a generous loan  
534 from J. Lichtman and F. Engert. Using the published 18.8 nm/px reference map and  
535 reconstructions (Hildebrand et al., 2017), we targeted re-imaging at 4 nm/px to the

536 entirety of the myelinated utricular afferents (identified by their peripheral processes  
537 reaching for the utricular macula) and VS neurons (identified by their position and  
538 axonal projections into the spinal cord) on one side of the brainstem, covering  $\sim 95 \mu\text{m}$   
539 in the rostrocaudal axis. Imaging was carried out on a Zeiss Merlin 540 FE-SEM with a  
540 solid-state backscatter detector. The ATLAS scan engine was controlled via  
541 WaferMapper (Hayworth et al., 2014). The resulting images were aligned onto the 18.8  
542 nm/px dataset using linear affine transformations in FIJI with the TrakEM2 plug-in  
543 (Cardona et al., 2012) and will be freely available after publication. In a small subset of  
544 identified synapses, we carried out further re-imaging at 1 nm/px to visualize the  
545 hallmarks of gap junctions.

546 The existing tracings of VS neurons and utricular afferents were extended to cover  
547 branches that had been missed or untraced in the original dataset. Afferent/Vs neuron  
548 appositions were considered to be synaptic contacts if the presynapse contained  
549 vesicles, the membranes were tightly apposed and straight, and there were signs of a  
550 postsynaptic density. In cases where appositions were more difficult to determine, such  
551 as those parallel to the plane of section, vesicle clustering at a tight apposition was used  
552 as the criterion for a synapse.

553 Analysis:

554 All analysis are implemented in Matlab (Mathworks).

555 Event detection:

556 EPSC events were detected by a derivative method (Bagnall and McLean, 2014).

557 Tuning index of all EPSCs was calculated as the vectoral sum of all events' phase,  
558 weighted by the EPSC amplitude.

559 
$$Tuning\ index = \frac{|\sum A_j * e^{i*\theta_j}|}{\sum A_j}, i = \sqrt{-1}$$

560 ( $A_j$  is the amplitude of each EPSC event  $j$ , and  $\theta_j$  is the phase of that event relative to  
561 the sinusoidal stimulus on each axis.)

562 Deconvolution of electrical and chemical signals

563 We assumed that the signals we observed on voltage clamp were majorly composed of  
564 electrical EPSCs and chemical EPSCs from afferents, based on our observation from  
565 the pharmacology data.

566

567 
$$S = conv(w_e, s_e) + conv(w_c, s_c) + residuals$$

568

569 ( $w_e, w_c$  are the kernels of electrical and chemical components of EPSCs, both derived  
570 from their waveforms shown in Fig. 2, and  $s_e, s_c$  are the separated electrical and  
571 chemical signals)

572 A sparse deconvolution algorithm with L1 regularization, derived from FISTA ((Beck and  
573 Teboulle, 2009), was applied to obtain  $s_e, s_c$  by minimizing the objective function:

$$574 \quad F(s_e, s_c) \equiv \frac{1}{2} (S_{observed} - S_{reconstruct})^2 + \lambda_e * |s_e| + \lambda_c * |s_c|,$$

575 where:

$$576 \quad S_{reconstruct} = conv(w_e, s_e) + conv(w_c, s_c)$$

577

578  $\lambda_e$  and  $\lambda_c$  were defined by the root mean square of the signal and magnitude of kernel

579 waveform:  $\lambda_i = rms(S_{observed}) * \sqrt{w_i * w_i^T}$ . Maximum iteration cycle was set at 500

### 580 Clustering and quantification of electrical events

581 Amplitude-invariant EPSCs are mediated by gap junctions, therefore only electrical  
582 signals  $s_e$  were used to infer individual afferent inputs. A threshold of  $3.5 * std(s_e)$  was  
583 used for event detection. Detected electrical events were clustered by ISO-SPLIT  
584 (Chung et al., 2017). Some clusters were merged or split manually after examination.  
585 Clusters with refractory period (threshold: probability < 0.003 within 1 ms) in auto-  
586 correlograms (100 ms) were considered from an individual afferent.

587 For each cluster, the tuning vector of inferred afferent  $k$  on each axis was quantified as:

$$588 \quad z_k = \frac{\sum e^{i*\theta_j}}{N_c * A_s} * f_s, i = \sqrt{-1}$$

589 ( $\theta_j$  is the phase of EPSC event  $j$  in cluster  $k$ .  $N_c$  is the number of cycles for sinusoidal  
590 translation,  $f_s$  [Hz] and  $A_s$  [g] are the frequency and amplitude of the stimulus. The  
591 absolute value and argument of  $z$  represent the tuning gain and the tuning phase,  
592 respectively.)

593 Tuning in four axes was fitted into a 2-dimensional spatiotemporal model (Angelaki,  
594 1992) to obtain the maximum tuning direction, the tuning gain and phase in that  
595 direction.

596 Afferent inputs similarity index for a VS neuron was determined as:

$$597 \quad \frac{|\sum A_k * z_k|}{\sum A_k * n_k}$$

598 ( $A_k, z_k, n_k$  are the average EPSC amplitude, tuning vector and number of events for  
599 cluster  $k$ .)

### 600 AC/DC response quantification

601 AC of membrane potential and spiking response were defined as the amplitude of  
602 sinusoidal fit (2 Hz) of the membrane potential, and the spike vectorial sum during  
603 sensory stimulation, respectively. DC of membrane potential and spiking response were  
604 defined as the average membrane potential during sensory stimulation above baseline  
605 (no stimulation), and the total spike number during sensory stimulation above baseline.



606 For spiking responses, VS neurons with firing rate > 4 spike/cycle and spike AC or  
607 DC >1 spike/cycle were included in the analysis.

608 **Bootstrapping:**  $\binom{n_i}{2}$  afferent pairs were counted for VS neuron  $i$  with  $n_i$  distinct afferent  
609 inputs ( $n_i \geq 2$ ). The same number of total afferent pairs  $\sum_{i=1}^m \binom{n_i}{2}$  from all  $m$  VS neurons  
610 was randomly selected among all  $\sum_{i=1}^m n_i$  inferred afferents to determine the  
611 convergence angle or phase difference distribution by chance, and such selection was  
612 performed 5000 times to calculate mean and standard deviation.

### 613 **Acknowledgements**

614 We thank Dr. Richard Roberts for helping set up the electrophysiology recording rig,  
615 Drs. Rebecca Callahan, Mohini Sengupta and Mr. Saul Bello Rojas for thoughtful  
616 critiques of the paper. We are grateful to Drs. Daniel Kerschensteiner and David  
617 Schoppik for insightful comments on the manuscript. We also acknowledge the  
618 Washington University Zebrafish Facility for fish care and Washington University Center  
619 for Cellular Imaging (WUCCI) for supporting the confocal imaging experiments. This  
620 work is supported by funding through the National Institute of Health (NIH) R00  
621 DC012536 (M.W.B.), R01 DC016413 (M.W.B.), a Sloan Research Fellowship (M.W.B.),  
622 and the National BioResource Project in Japan (S.H.). M.W.B. is a Pew Biomedical  
623 Scholar and a McKnight Foundation Scholar.

624

### 625 **Author contributions:**

626 K.M and S.H generated the *Tg(nefma:gal4, UAS:GFP)* fish line. Z.L and M.B conceived  
627 the project. Z.L performed the electrophysiology, confocal imaging experiments and  
628 analyzed the data. T.H helped develop the deconvolution algorithm for sorting EPSC  
629 events. M.B, J.M and D.H carried out the serial section EM imaging and reconstruction.  
630 Z.L. and M.B wrote the manuscript with input from all other authors.

631

### 632 **Declaration of Interests:**

633 The authors declare no competing interests

634

### 635 **References:**

- 636 AKROUH, A. & KERSCHENSTEINER, D. 2013. Intersecting Circuits Generate Precisely Patterned  
637 Retinal Waves. *Neuron*, 79, 322-334.
- 638 ALONSO, J. M. & MARTINEZ, L. M. 1998. Functional connectivity between simple cells and  
639 complex cells in cat striate cortex. *Nature Neuroscience*, 1, 395-403.
- 640 ANGELAKI, D. E. 1992. SPATIOTEMPORAL CONVERGENCE (STC) IN OTOLITH NEURONS.  
641 *Biological Cybernetics*, 67, 83-96.
- 642 ANGELAKI, D. E., BUSH, G. A. & PERACHIO, A. A. 1993. 2-DIMENSIONAL SPATIOTEMPORAL  
643 CODING OF LINEAR ACCELERATION IN VESTIBULAR NUCLEI NEURONS. *Journal of*  
644 *Neuroscience*, 13, 1403-1417.

- 645 ANGELAKI, D. E. & CULLEN, K. E. 2008. Vestibular system: The many facets of a multimodal  
646 sense. *Annual Review of Neuroscience*, 31, 125-150.
- 647 ANGELAKI, D. E. & DICKMAN, J. D. 2000. Spatiotemporal processing of linear acceleration:  
648 Primary afferent and central vestibular neuron responses. *Journal of Neurophysiology*,  
649 84, 2113-2132.
- 650 ARENZ, A., SILVER, R. A., SCHAEFER, A. T. & MARGRIE, T. W. 2008. The contribution of single  
651 synapses to sensory representation in vivo. *Science*, 321, 977-80.
- 652 BAGNALL, M. W., MCELVAIN, L. E., FAULSTICH, M. & DU LAC, S. 2008. Frequency-independent  
653 synaptic transmission supports a linear vestibular behavior. *Neuron*, 60, 343-52.
- 654 BAGNALL, M. W. & MCLEAN, D. L. 2014. Modular organization of axial microcircuits in zebrafish.  
655 *Science (New York, N.Y.)*, 343, 197-200.
- 656 BECK, A. & TBOULLE, M. 2009. A Fast Iterative Shrinkage-Thresholding Algorithm for Linear  
657 Inverse Problems. *Siam Journal on Imaging Sciences*, 2, 183-202.
- 658 BOYLE, R., GOLDBERG, J. M. & HIGHSTEIN, S. M. 1992. Inputs from regularly and irregularly  
659 discharging vestibular nerve afferents to secondary neurons in squirrel monkey  
660 vestibular nuclei. III. Correlation with vestibulospinal and vestibuloocular output  
661 pathways. *J Neurophysiol*, 68, 471-84.
- 662 BOYLE, R. & JOHANSON, C. 2003. Morphological properties of vestibulospinal neurons in  
663 primates. *Annals of the New York Academy of Sciences*, 1004, 183-195.
- 664 BRUNO, R. M., KHATRI, V., LAND, P. W. & SIMONS, D. J. 2003. Thalamocortical angular tuning  
665 domains within individual barrels of rat somatosensory cortex. *Journal of Neuroscience*,  
666 23, 9565-9574.
- 667 BUDELLI, R. & MACADAR, O. 1979. STATO-ACOUSTIC PROPERTIES OF UTRICULAR AFFERENTS.  
668 *Journal of Neurophysiology*, 42, 1479-1493.
- 669 CARDONA, A., SAALFELD, S., SCHINDELIN, J., ARGANDA-CARRERAS, I., PREIBISCH, S., LONGAIR,  
670 M., TOMANCAK, P., HARTENSTEIN, V. & DOUGLAS, R. J. 2012. TrakEM2 Software for  
671 Neural Circuit Reconstruction. *Plos One*, 7.
- 672 CHABROL, F. P., ARENZ, A., WIECHERT, M. T., MARGRIE, T. W. & DIGREGORIO, D. A. 2015.  
673 Synaptic diversity enables temporal coding of coincident multisensory inputs in single  
674 neurons. *Nat Neurosci*, 18, 718-27.
- 675 CHUNG, J. E., MAGLAND, J. F., BARNETT, A. H., TOLOSA, V. M., TOOKER, A. C., LEE, K. Y., SHAH,  
676 K. G., FELIX, S. H., FRANK, L. M. & GREENGARD, L. F. 2017. A Fully Automated Approach  
677 to Spike Sorting. *Neuron*, 95, 1381-1394 e6.
- 678 CULLEN, K. E. 2019. Vestibular processing during natural self-motion: implications for  
679 perception and action. *Nature Reviews Neuroscience*, 20, 346-363.
- 680 EATOCK, R. A. & SONGER, J. E. 2011. Vestibular hair cells and afferents: two channels for head  
681 motion signals. *Annu Rev Neurosci*, 34, 501-34.
- 682 EHRLICH, D. E. & SCHOPPIK, D. 2017. Control of Movement Initiation Underlies the  
683 Development of Balance. *Current Biology*, 27, 334-344.
- 684 EHRLICH, D. E. & SCHOPPIK, D. 2019. A primal role for the vestibular sense in the development  
685 of coordinated locomotion. *Elife*, 8.
- 686 FAVRE-BULLE, I. A., VANWALLEGHEM, G., TAYLOR, M. A., RUBINSZTEIN-DUNLOP, H. & SCOTT, E.  
687 K. 2018. Cellular-Resolution Imaging of Vestibular Processing across the Larval Zebrafish  
688 Brain. *Curr Biol*, 28, 3711-3722 e3.

- 689 FAY, R. R. 1984. THE GOLDFISH EAR CODES THE AXIS OF ACOUSTIC PARTICLE MOTION IN 3  
690 DIMENSIONS. *Science*, 225, 951-954.
- 691 FELLEMAN, D. J. & VAN ESSEN, D. C. 1991. Distributed Hierarchical Processing in the Primate  
692 Cerebral Cortex. *Cerebral Cortex*, 1, 1-47.
- 693 FERNANDEZ, C. & GOLDBERG, J. M. 1976a. PHYSIOLOGY OF PERIPHERAL NEURONS  
694 INNERVATING OTOLITH ORGANS OF SQUIRREL-MONKEY .1. RESPONSE TO STATIC TILTS  
695 AND TO LONG-DURATION CENTRIFUGAL FORCE. *Journal of Neurophysiology*, 39, 970-  
696 984.
- 697 FERNANDEZ, C. & GOLDBERG, J. M. 1976b. PHYSIOLOGY OF PERIPHERAL NEURONS  
698 INNERVATING OTOLITH ORGANS OF SQUIRREL-MONKEY .3. RESPONSE DYNAMICS.  
699 *Journal of Neurophysiology*, 39, 996-1008.
- 700 FERNANDEZ, C., GOLDBERG, J. M. & ABEND, W. K. 1972. RESPONSE TO STATIC TILTS OF  
701 PERIPHERAL NEURONS INNERVATING OTOLITH ORGANS OF SQUIRREL-MONKEY. *Journal*  
702 *of Neurophysiology*, 35, 978-+.
- 703 GOLDBERG, J. M., DESMADRYL, G., BAIRD, R. A. & FERNANDEZ, C. 1990. THE VESTIBULAR NERVE  
704 OF THE CHINCHILLA .4. DISCHARGE PROPERTIES OF UTRICULAR AFFERENTS. *Journal of*  
705 *Neurophysiology*, 63, 781-790.
- 706 HADDON, C., MOWBRAY, C., WHITFIELD, T., JONES, D., GSCHMEISSNER, S. & LEWIS, J. 1999.  
707 Hair cells without supporting cells: further studies in the ear of the zebrafish mind bomb  
708 mutant. *J Neurocytol*, 28, 837-50.
- 709 HAYWORTH, K. J., MORGAN, J. L., SCHALEK, R., BERGER, D. R., HILDEBRAND, D. G. C. &  
710 LICHTMAN, J. W. 2014. Imaging ATUM ultrathin section libraries with WaferMapper: a  
711 multi-scale approach to EM reconstruction of neural circuits. *Frontiers in Neural Circuits*,  
712 8.
- 713 HILDEBRAND, D. G. C., CICCONE, M., TORRES, R. M., CHOI, W., QUAN, T. M., MOON, J.,  
714 WETZEL, A. W., SCOTT CHAMPION, A., GRAHAM, B. J., RANDLETT, O., PLUMMER, G. S.,  
715 PORTUGUES, R., BIANCO, I. H., SAALFELD, S., BADEN, A. D., LILLANEY, K., BURNS, R.,  
716 VOGELSTEIN, J. T., SCHIER, A. F., LEE, W. A., JEONG, W. K., LICHTMAN, J. W. & ENGERT,  
717 F. 2017. Whole-brain serial-section electron microscopy in larval zebrafish. *Nature*, 545,  
718 345-349.
- 719 HUBEL, D. H. & WIESEL, T. N. 1962. RECEPTIVE FIELDS, BINOCULAR INTERACTION AND  
720 FUNCTIONAL ARCHITECTURE IN CATS VISUAL CORTEX. *Journal of Physiology-London*,  
721 160, 106-&.
- 722 JIA, H., ROCHEFORT, N. L., CHEN, X. & KONNERTH, A. 2010. Dendritic organization of sensory  
723 input to cortical neurons in vivo. *Nature*, 464, 1307-1312.
- 724 KIMMEL, C. B., POWELL, S. L. & METCALFE, W. K. 1982. Brain neurons which project to the  
725 spinal cord in young larvae of the zebrafish. *The Journal of comparative neurology*, 205,  
726 112-27.
- 727 KIMURA, Y., HISANO, Y., KAWAHARA, A. & HIGASHIJIMA, S. 2014. Efficient generation of knock-  
728 in transgenic zebrafish carrying reporter/driver genes by CRISPR/Cas9-mediated genome  
729 engineering. *Scientific Reports*, 4.
- 730 KODAMA, T., GITTIS, A., SHIN, M., KELLEHER, K., KOLKMAN, K., MCELVAIN, L., LAM, M. & DU  
731 LAC, S. 2020. Graded co-expression of ion channel, neurofilament, and synaptic genes in  
732 fast-spiking vestibular nucleus neurons. *J Neurosci*.

- 733 KORN, H., SOTELO, C. & BENNETT, M. V. L. 1977. The lateral vestibular nucleus of the toadfish  
734 *Opsanus tau*: Ultrastructural and electrophysiological observations with special  
735 reference to electrotonic transmission. *Neuroscience*.
- 736 LAURENS, J., LIU, S., YU, X. J., CHAN, R., DICKMAN, D., DEANGELIS, G. C. & ANGELAKI, D. E. 2017.  
737 Transformation of spatiotemporal dynamics in the macaque vestibular system from  
738 otolith afferents to cortex. *Elife*, 6.
- 739 LAVZIN, M., RAPOPORT, S., POLSKY, A., GARION, L. & SCHILLER, J. 2012. Nonlinear dendritic  
740 processing determines angular tuning of barrel cortex neurons in vivo. *Nature*, 490, 397-  
741 401.
- 742 LECUN, Y., BENGIO, Y. & HINTON, G. 2015. Deep learning. *Nature*, 521, 436-444.
- 743 LU, Z., XU, Z. & BUCHSER, W. J. 2004. Coding of acoustic particle motion by utricular fibers in  
744 the sleeper goby, *Dormitator latifrons*. *Journal of Comparative Physiology a-  
745 Neuroethology Sensory Neural and Behavioral Physiology*, 190, 923-938.
- 746 MARUSKA, K. P. & MENSINGER, A. F. 2015. Directional sound sensitivity in utricular afferents in  
747 the toadfish *Opsanus tau*. *Journal of Experimental Biology*, 218, 1759-1766.
- 748 MCELVAIN, L. E., FAULSTICH, M., JEANNE, J. M., MOORE, J. D. & DU LAC, S. 2015.  
749 Implementation of linear sensory signaling via multiple coordinated mechanisms at  
750 central vestibular nerve synapses. *Neuron*, 85, 1132-44.
- 751 MCLEAN, D. L. & FETCHO, J. R. 2009. Spinal Interneurons Differentiate Sequentially from Those  
752 Driving the Fastest Swimming Movements in Larval Zebrafish to Those Driving the  
753 Slowest Ones. *Journal of Neuroscience*, 29, 13566-13577.
- 754 MIGAULT, G., VAN DER PLAS, T. L., TRENTESAUX, H., PANIER, T., CANDELIER, R., PROVILLE, R.,  
755 ENGLITZ, B., DEBREGEAS, G. & BORMUTH, V. 2018. Whole-Brain Calcium Imaging during  
756 Physiological Vestibular Stimulation in Larval Zebrafish. *Curr Biol*, 28, 3723-3735 e6.
- 757 MO, W., CHEN, F. Y., NECHIPORUK, A. & NICOLSON, T. 2010. Quantification of vestibular-  
758 induced eye movements in zebrafish larvae. *Bmc Neuroscience*, 11.
- 759 NAGY, J. I., BAUTISTA, W., BLAKLEY, B. & RASH, J. E. 2013. Morphologically mixed chemical-  
760 electrical synapses formed by primary afferents in rodent vestibular nuclei as revealed  
761 by immunofluorescence detection of connexin36 and vesicular glutamate transporter-1.  
762 *Neuroscience*, 252, 468-88.
- 763 NEUHUBER, W. L. & ZENKER, W. 1989. CENTRAL DISTRIBUTION OF CERVICAL PRIMARY  
764 AFFERENTS IN THE RAT, WITH EMPHASIS ON PROPRIOCEPTIVE PROJECTIONS TO  
765 VESTIBULAR, PERIHYPOGLOSSAL, AND UPPER THORACIC SPINAL NUCLEI. *Journal of  
766 Comparative Neurology*, 280, 231-253.
- 767 NEWLANDS, S. D. & PERACHIO, A. A. 2003. Central projections of the vestibular nerve: a review  
768 and single fiber study in the Mongolian gerbil. *Brain Research Bulletin*, 60, 475-495.
- 769 ORLOVSKY, G. N. 1972. ACTIVITY OF VESTIBULOSPINAL NEURONS DURING LOCOMOTION. *Brain  
770 Research*, 46, 85-&.
- 771 PETERSEN, C. C. H. 2007. The functional organization of the barrel cortex. *Neuron*, 56, 339-355.
- 772 PETERSON, B. W. 1970. Distribution of neural responses to tilting within vestibular nuclei of the  
773 cat. *J Neurophysiol*, 33, 750-67.
- 774 PLATT, C. 1977. HAIR CELL DISTRIBUTION AND ORIENTATION IN GOLDFISH OTOLITH ORGANS.  
775 *Journal of Comparative Neurology*, 172, 283-297.

- 776 PRIEBE, N. J. & FERSTER, D. 2012. Mechanisms of Neuronal Computation in Mammalian Visual  
777 Cortex. *Neuron*, 75, 194-208.
- 778 PRIEBE, N. J., MECHLER, F., CARANDINI, M. & FERSTER, D. 2004. The contribution of spike  
779 threshold to the dichotomy of cortical simple and complex cells. *Nature Neuroscience*, 7,  
780 1113-1122.
- 781 RILEY, B. B. & MOORMAN, S. J. 2000. Development of utricular otoliths, but not saccular  
782 otoliths, is necessary for vestibular function and survival in zebrafish. *J Neurobiol*, 43,  
783 329-37.
- 784 ROBERTS, R., ELSNER, J. & BAGNALL, M. W. 2017. Delayed Otolith Development Does Not  
785 Impair Vestibular Circuit Formation in Zebrafish. *J Assoc Res Otolaryngol*, 18, 415-425.
- 786 ROY, N. C., BESSAIH, T. & CONTRERAS, D. 2011. Comprehensive mapping of whisker-evoked  
787 responses reveals broad, sharply tuned thalamocortical input to layer 4 of barrel cortex.  
788 *Journal of Neurophysiology*, 105, 2421-2437.
- 789 SARKISIAN, V. H. 2000. Input-output relations of Deiters' lateral vestibulospinal neurons with  
790 different structures of the brain. *Archives Italiennes De Biologie*, 138, 295-353.
- 791 SCHOPPIK, D., BIANCO, I. H., PROBER, D. A., DOUGLASS, A. D., ROBSON, D. N., LI, J. M. B.,  
792 GREENWOOD, J. S. F., SOUCY, E., ENGERT, F. & SCHIER, A. F. 2017. Gaze-Stabilizing  
793 Central Vestibular Neurons Project Asymmetrically to Extraocular Motoneuron Pools. *J*  
794 *Neurosci*, 37, 11353-11365.
- 795 SCHOR, R. H., MILLER, A. D. & TOMKO, D. L. 1984. Responses to head tilt in cat central  
796 vestibular neurons. I. Direction of maximum sensitivity. *J Neurophysiol*, 51, 136-46.
- 797 SHERMAN, S. M. 2005. Thalamic relays and cortical functioning. In: CASAGRANDE, V. A.,  
798 GUILLERY, R. W. & SHERMAN, S. M. (eds.) *Cortical Function: a View from the Thalamus*.
- 799 SKOTTUN, B. C., DE VALOIS, R. L., GROSOFF, D. H., MOVSHON, J. A., ALBRECHT, D. G. & BONDS,  
800 A. B. 1991. Classifying simple and complex cells on the basis of response modulation.  
801 *Vision Res*, 31, 1079-86.
- 802 SMEAR, M. C., TAO, H. Z. W., STAUB, W., ORGER, M. B., GOSSE, N. J., LIU, Y., TAKAHASHI, K.,  
803 POO, M. M. & BAIER, H. 2007. Vesicular glutamate transport at a central synapse limits  
804 the acuity of visual perception in zebrafish. *Neuron*, 53, 65-77.
- 805 STRAKA, H. & DIERINGER, N. 1996. Uncrossed disynaptic inhibition of second-order vestibular  
806 neurons and its interaction with monosynaptic excitation from vestibular nerve afferent  
807 fibers in the frog. *Journal of Neurophysiology*, 76, 3087-3101.
- 808 TOMKO, D. L., PETERKA, R. J. & SCHOR, R. H. 1981. RESPONSES TO HEAD TILT IN CAT 8TH NERVE  
809 AFFERENTS. *Experimental Brain Research*, 41, 216-221.
- 810 TURECEK, J., JACKMAN, S. L. & REGEHR, W. G. 2017. Synaptotagmin 7 confers frequency  
811 invariance onto specialized depressing synapses. *Nature*, 551, 503-506.
- 812 USREY, W. M., REPPAS, J. B. & REID, R. C. 1999. Specificity and strength of retinogeniculate  
813 connections. *Journal of Neurophysiology*, 82, 3527-3540.
- 814 VOESENEK, C. J., PIETERS, R. P. M. & VAN LEEUWEN, J. L. 2016. Automated Reconstruction of  
815 Three-Dimensional Fish Motion, Forces, and Torques. *Plos One*, 11.
- 816 WILENT, W. B. & CONTRERAS, D. 2005. Dynamics of excitation and inhibition underlying  
817 stimulus selectivity in rat somatosensory cortex. *Nature Neuroscience*, 8, 1364-1370.
- 818 WITTS, E. C. & MURRAY, A. J. 2019. Vestibulospinal contributions to mammalian locomotion.  
819 *Current Opinion in Physiology*, 8.

820
